# Supplementary material for: Spatial subsidies drive sweet spots of tropical marine biomass production
Source: PLoS Biol. 2021 Nov 2;19(11):e3001435. doi: 10.1371/journal.pbio.3001435 (PMC8562822; doi:10.1371/journal.pbio.3001435)
Supplement: S1 Data — RLS, Reef Life Survey. (CSV) [file pbio.3001435.s010.csv]

Realm	Country	Ecoregion	Number	Locality	Latitude	Longitude
Western Indian	Maldives	Maldives	1	MAL7	3.48	72.87
Western Indian	Maldives	Maldives	1	MAL4	3.94	72.91
Western Indian	Maldives	Maldives	1	MAL3	4.13	72.84
Western Indian	Maldives	Maldives	1	MAL12	3.97	73.49
Western Indian	Maldives	Maldives	1	MAL8	3.6	72.88
Western Indian	Maldives	Maldives	1	MAL9	3.59	72.72
Western Indian	Maldives	Maldives	1	MAL2	4.28	73.56
Western Indian	Maldives	Maldives	1	MAL11	3.78	72.97
Western Indian	Maldives	Maldives	1	MAL6	3.8	72.7
Western Indian	Maldives	Maldives	1	MAL5	3.73	72.76
Western Indian	Maldives	Maldives	1	MAL10	3.64	72.93
Western Indian	Egypt	Northern and Central Red Sea	2	RED10	24.25	35.54
Western Indian	Egypt	Northern and Central Red Sea	2	RED6	23.41	35.93
Western Indian	Israel	Northern and Central Red Sea	2	RED17	29.43	34.97
Western Indian	Egypt	Northern and Central Red Sea	2	RED9	24.22	35.61
Western Indian	Egypt	Northern and Central Red Sea	2	RED2	23.34	35.85
Western Indian	Egypt	Northern and Central Red Sea	2	RED11	24.67	35.13
Western Indian	Egypt	Northern and Central Red Sea	2	RED13	25.07	34.94
Western Indian	Egypt	Northern and Central Red Sea	2	RED12	24.79	35.18
Western Indian	Egypt	Northern and Central Red Sea	2	RED1	23.42	35.99
Western Indian	Israel	Northern and Central Red Sea	2	RED14	29.5	34.92
Western Indian	Egypt	Northern and Central Red Sea	2	RED5	23.43	35.86
Western Indian	Egypt	Northern and Central Red Sea	2	RED8	24.16	35.71
Western Indian	Egypt	Northern and Central Red Sea	2	RED4	23.43	35.9
Western Indian	Egypt	Northern and Central Red Sea	2	RED3	23.43	35.88
Western Indian	Egypt	Northern and Central Red Sea	2	RED7	23.64	35.83
Western Indian	Seychelles	Seychelles	3	SEY6	-4.6	55.42
Western Indian	Seychelles	Seychelles	3	SEY3	-4.64	55.38
Western Indian	Seychelles	Seychelles	3	SEY10	-4.67	55.37
Western Indian	Seychelles	Seychelles	3	SEY2	-4.59	55.43
Western Indian	Seychelles	Seychelles	3	SEY9	-4.61	55.42
Western Indian	Seychelles	Seychelles	3	SEY4	-4.64	55.37
Western Indian	Seychelles	Seychelles	3	SEY7	-4.6	55.42
Western Indian	Seychelles	Seychelles	3	SEY1	-4.56	55.43
Western Indian	Seychelles	Seychelles	3	SEY8	-4.58	55.43
Western Indian	Seychelles	Seychelles	3	SEY11	-4.67	55.4
Western Indian	Seychelles	Seychelles	3	SEY5	-4.62	55.41
Western Indian	Seychelles	Seychelles	3	SEY12	-4.62	55.39
Western Indian	Indonesia	Western Sumatra	4	ACEH9	5.83	95.38
Western Indian	Indonesia	Western Sumatra	4	ACEH8	5.89	95.25
Western Indian	Indonesia	Western Sumatra	4	ACEH11	5.87	95.27
Western Indian	Indonesia	Western Sumatra	4	ACEH28	5.87	95.27
Western Indian	Indonesia	Western Sumatra	4	ACEH18	5.78	95.34
Western Indian	Indonesia	Western Sumatra	4	ACEH29	5.61	95.19
Western Indian	Indonesia	Western Sumatra	4	ACEH27	5.85	95.27
Western Indian	Indonesia	Western Sumatra	4	ACEH19	5.8	95.35
Western Indian	Indonesia	Western Sumatra	4	ACEH6	5.67	95.13
Western Indian	Indonesia	Western Sumatra	4	ACEH26	5.86	95.27
Western Indian	Indonesia	Western Sumatra	4	ACEH13	5.66	95.09
Western Indian	Indonesia	Western Sumatra	4	ACEH30	5.63	95.13
Western Indian	Indonesia	Western Sumatra	4	ACEH5	5.63	95.14
Western Indian	Indonesia	Western Sumatra	4	ACEH23	5.86	95.36
Western Indian	Indonesia	Western Sumatra	4	ACEH4	5.89	95.25
Western Indian	Indonesia	Western Sumatra	4	ACEH16	5.89	95.25
Western Indian	Indonesia	Western Sumatra	4	ACEH1	5.88	95.26
Western Indian	Indonesia	Western Sumatra	4	ACEH2	5.88	95.26
Western Indian	Indonesia	Western Sumatra	4	ACEH7	5.9	95.25
Western Indian	Indonesia	Western Sumatra	4	ACEH24	5.89	95.34
Western Indian	Indonesia	Western Sumatra	4	ACEH12	5.9	95.25
Western Indian	Indonesia	Western Sumatra	4	ACEH10	5.88	95.35
Western Indian	Indonesia	Western Sumatra	4	ACEH17	5.87	95.26
Western Indian	Indonesia	Western Sumatra	4	ACEH15	5.85	95.28
Western Indian	Indonesia	Western Sumatra	4	ACEH20	5.89	95.26
Western Indian	Indonesia	Western Sumatra	4	ACEH21	5.88	95.25
Western Indian	Indonesia	Western Sumatra	4	ACEH22	5.88	95.25
Western Indian	Indonesia	Western Sumatra	4	ACEH3	5.89	95.25
Western Indian	Tanzania	East African Coral Coast	5	TZN6	-10.26	40.19
Western Indian	Tanzania	East African Coral Coast	5	TZN1	-10.19	40.14
Western Indian	Tanzania	East African Coral Coast	5	TZN9	-10.31	40.39
Western Indian	Tanzania	East African Coral Coast	5	TZN2	-10.2	40.14
Western Indian	Tanzania	East African Coral Coast	5	TZN3	-10.23	40.17
Western Indian	Tanzania	East African Coral Coast	5	TZN7	-10.26	40.19
Western Indian	Tanzania	East African Coral Coast	5	TZN4	-10.24	40.19
Western Indian	Tanzania	East African Coral Coast	5	TZN8	-10.25	40.16
Central Indo-Pacific	Papua New Guinea	Bismarck Sea	6	PNG1	-5.09	150.2
Central Indo-Pacific	Papua New Guinea	Bismarck Sea	6	PNG2	-5.24	150.11
Central Indo-Pacific	Papua New Guinea	Bismarck Sea	6	PNG3	-5.3	150.11
Central Indo-Pacific	Papua New Guinea	Bismarck Sea	6	PNG4	-5.24	150.17
Central Indo-Pacific	Papua New Guinea	Bismarck Sea	6	PNG5	-5.3	150.16
Central Indo-Pacific	Papua New Guinea	Bismarck Sea	6	PNG6	-5.16	150.16
Central Indo-Pacific	Papua New Guinea	Bismarck Sea	6	PNG8	-5.29	150.13
Central Indo-Pacific	Papua New Guinea	Bismarck Sea	6	PNG9	-5.43	150.09
Central Indo-Pacific	Indonesia	Banda Sea	7	AH2	-3.74	128.13
Central Indo-Pacific	Indonesia	Banda Sea	7	AH5	-3.77	128.15
Central Indo-Pacific	Indonesia	Banda Sea	7	TI9	-8.32	130.76
Central Indo-Pacific	Indonesia	Banda Sea	7	BS2	-4.52	129.9
Central Indo-Pacific	Indonesia	Banda Sea	7	BS3	-4.52	129.9
Central Indo-Pacific	Indonesia	Banda Sea	7	BS4	-4.53	129.89
Central Indo-Pacific	Indonesia	Banda Sea	7	BA13	-6.01	132.43
Central Indo-Pacific	Indonesia	Banda Sea	7	BA7	-5.3	132
Central Indo-Pacific	Indonesia	Banda Sea	7	TI6	-7.88	130.94
Central Indo-Pacific	Indonesia	Banda Sea	7	BA11	-5.67	132.58
Central Indo-Pacific	Indonesia	Banda Sea	7	BS9	-4.64	130.06
Central Indo-Pacific	Indonesia	Banda Sea	7	AH4	-3.72	128.09
Central Indo-Pacific	Indonesia	Banda Sea	7	AH3	-3.71	128.1
Central Indo-Pacific	Indonesia	Banda Sea	7	TI3	-7.24	131.37
Central Indo-Pacific	Indonesia	Banda Sea	7	BS5	-4.51	129.88
Central Indo-Pacific	Indonesia	Banda Sea	7	BS6	-4.51	129.88
Central Indo-Pacific	Indonesia	Banda Sea	7	BA2	-4.59	131.69
Central Indo-Pacific	Indonesia	Banda Sea	7	BA1	-4.53	131.65
Central Indo-Pacific	Indonesia	Banda Sea	7	TI5	-7.51	131.14
Central Indo-Pacific	Indonesia	Banda Sea	7	BA3	-4.54	131.78
Central Indo-Pacific	Indonesia	Banda Sea	7	TI2	-7.23	131.36
Central Indo-Pacific	Indonesia	Banda Sea	7	BA12	-5.78	132.63
Central Indo-Pacific	Indonesia	Banda Sea	7	TI1	-7.11	131.43
Central Indo-Pacific	Indonesia	Banda Sea	7	BA4	-4.72	131.73
Central Indo-Pacific	Indonesia	Banda Sea	7	BA5	-5.14	132.01
Central Indo-Pacific	Indonesia	Banda Sea	7	BA6	-5.17	132.01
Central Indo-Pacific	Indonesia	Banda Sea	7	BA10	-5.64	132.63
Central Indo-Pacific	Indonesia	Banda Sea	7	TI8	-8.31	130.76
Central Indo-Pacific	Indonesia	Banda Sea	7	BS7	-4.51	129.94
Central Indo-Pacific	Indonesia	Banda Sea	7	BS8	-4.58	130.04
Central Indo-Pacific	Indonesia	Banda Sea	7	TI4	-7.45	131.26
Central Indo-Pacific	Indonesia	Banda Sea	7	BS1	-4.51	129.89
Central Indo-Pacific	Indonesia	Papua	8	RAJA19	-0.54	130.25
Central Indo-Pacific	Indonesia	Papua	8	RAJA41	-0.56	130.52
Central Indo-Pacific	Indonesia	Papua	8	RAJA54	-2.03	130.68
Central Indo-Pacific	Indonesia	Papua	8	RAJA14	-0.45	130.7
Central Indo-Pacific	Indonesia	Papua	8	RAJA32	-0.45	130.69
Central Indo-Pacific	Indonesia	Papua	8	RAJA17	-0.51	130.74
Central Indo-Pacific	Indonesia	Papua	8	RAJA50	-2.23	130.6
Central Indo-Pacific	Indonesia	Papua	8	RAJA51	-2.22	130.61
Central Indo-Pacific	Indonesia	Papua	8	RAJA40	-0.52	130.46
Central Indo-Pacific	Indonesia	Papua	8	RAJA6	-0.56	130.69
Central Indo-Pacific	Indonesia	Papua	8	RAJA38	-0.51	130.45
Central Indo-Pacific	Indonesia	Papua	8	RAJA42	-2	130.64
Central Indo-Pacific	Indonesia	Papua	8	RAJA31	-0.58	130.55
Central Indo-Pacific	Indonesia	Papua	8	RAJA20	-0.59	130.3
Central Indo-Pacific	Indonesia	Papua	8	RAJA46	-1.97	130.5
Central Indo-Pacific	Indonesia	Papua	8	RAJA44	-2.01	130.63
Central Indo-Pacific	Indonesia	Papua	8	RAJA26	-0.59	130.58
Central Indo-Pacific	Indonesia	Papua	8	RAJA1	-0.56	130.67
Central Indo-Pacific	Indonesia	Papua	8	RAJA43	-2	130.64
Central Indo-Pacific	Indonesia	Papua	8	RAJA7	-0.55	130.69
Central Indo-Pacific	Indonesia	Papua	8	RAJA24	-0.56	130.68
Central Indo-Pacific	Indonesia	Papua	8	RAJA10	-0.56	130.68
Central Indo-Pacific	Indonesia	Papua	8	RAJA53	-2.02	130.69
Central Indo-Pacific	Indonesia	Papua	8	RAJA39	-0.51	130.46
Central Indo-Pacific	Indonesia	Papua	8	RAJA5	-0.56	130.54
Central Indo-Pacific	Indonesia	Papua	8	RAJA45	-1.97	130.46
Central Indo-Pacific	Indonesia	Papua	8	RAJA21	-0.59	130.31
Central Indo-Pacific	Indonesia	Papua	8	RAJA12	-0.51	130.67
Central Indo-Pacific	Indonesia	Papua	8	RAJA13	-0.52	130.67
Central Indo-Pacific	Indonesia	Papua	8	RAJA33	-0.5	130.73
Central Indo-Pacific	Indonesia	Papua	8	RAJA9	-0.54	130.69
Central Indo-Pacific	Indonesia	Papua	8	RAJA49	-2.22	130.55
Central Indo-Pacific	Indonesia	Papua	8	RAJA23	-0.58	130.64
Central Indo-Pacific	Indonesia	Papua	8	RAJA25	-0.6	130.56
Central Indo-Pacific	Indonesia	Papua	8	RAJA8	-0.54	130.63
Central Indo-Pacific	Indonesia	Papua	8	RAJA30	-0.7	130.71
Central Indo-Pacific	Indonesia	Papua	8	RAJA34	-0.96	131.15
Central Indo-Pacific	Indonesia	Papua	8	RAJA3	-0.57	130.67
Central Indo-Pacific	Indonesia	Papua	8	RAJA27	-0.42	130.57
Central Indo-Pacific	Indonesia	Papua	8	RAJA18	-0.59	130.6
Central Indo-Pacific	Indonesia	Papua	8	RAJA15	-0.55	130.69
Central Indo-Pacific	Indonesia	Papua	8	RAJA4	-0.56	130.69
Central Indo-Pacific	Indonesia	Papua	8	RAJA48	-2.22	130.57
Central Indo-Pacific	Indonesia	Papua	8	RAJA29	-0.7	130.72
Central Indo-Pacific	Indonesia	Papua	8	RAJA36	0.17	130.01
Central Indo-Pacific	Indonesia	Papua	8	raja35	0.17	130.03
Central Indo-Pacific	Indonesia	Papua	8	RAJA37	0.17	130.01
Central Indo-Pacific	Indonesia	Papua	8	RAJA47	-2.22	130.56
Central Indo-Pacific	Indonesia	Papua	8	RAJA28	-0.46	130.69
Central Indo-Pacific	Indonesia	Papua	8	RAJA2	-0.57	130.66
Central Indo-Pacific	Indonesia	Papua	8	RAJA52	-2.19	130.6
Central Indo-Pacific	Australia	Bonaparte Coast	9	NT14	-12.31	130.87
Central Indo-Pacific	Australia	Bonaparte Coast	9	WA83	-16.44	123.05
Central Indo-Pacific	Australia	Bonaparte Coast	9	WA85	-16.43	123.07
Central Indo-Pacific	Australia	Bonaparte Coast	9	NWS163	-14.5	125
Central Indo-Pacific	Australia	Bonaparte Coast	9	NWS165	-15.92	123.05
Central Indo-Pacific	Australia	Bonaparte Coast	9	NWS200	-13.94	125.64
Central Indo-Pacific	Australia	Bonaparte Coast	9	NWS199	-13.94	125.64
Central Indo-Pacific	Australia	Bonaparte Coast	9	NWS169	-15.52	123.27
Central Indo-Pacific	Australia	Bonaparte Coast	9	NWS171	-15.45	123.25
Central Indo-Pacific	Australia	Bonaparte Coast	9	NWS170	-15.45	123.24
Central Indo-Pacific	Australia	Bonaparte Coast	9	NWS168	-15.52	123.23
Central Indo-Pacific	Australia	Bonaparte Coast	9	NT8	-12.47	130.84
Central Indo-Pacific	Australia	Bonaparte Coast	9	NT9	-12.41	130.81
Central Indo-Pacific	Australia	Bonaparte Coast	9	NT13	-12.41	130.81
Central Indo-Pacific	Australia	Bonaparte Coast	9	NT10	-12.56	130.86
Central Indo-Pacific	Australia	Bonaparte Coast	9	NT2	-12.56	130.86
Central Indo-Pacific	Australia	Bonaparte Coast	9	OS2	-9.53	129.17
Central Indo-Pacific	Australia	Bonaparte Coast	9	OS1	-9.53	129.17
Central Indo-Pacific	Australia	Bonaparte Coast	9	NWS167	-15.78	123.36
Central Indo-Pacific	Australia	Bonaparte Coast	9	NWS197	-14.06	125.36
Central Indo-Pacific	Australia	Bonaparte Coast	9	NWS198	-14.06	125.36
Central Indo-Pacific	Australia	Bonaparte Coast	9	OS7	-10.89	130.1
Central Indo-Pacific	Australia	Bonaparte Coast	9	OS8	-10.91	130.1
Central Indo-Pacific	Australia	Bonaparte Coast	9	OS5	-11.14	129.91
Central Indo-Pacific	Australia	Bonaparte Coast	9	OS6	-11.13	129.91
Central Indo-Pacific	Australia	Bonaparte Coast	9	NT11	-12.34	130.85
Central Indo-Pacific	Australia	Bonaparte Coast	9	WA87	-16.4	123.04
Central Indo-Pacific	Australia	Bonaparte Coast	9	NT5	-12.48	130.79
Central Indo-Pacific	Australia	Bonaparte Coast	9	WA84	-16.43	123.09
Central Indo-Pacific	Australia	Bonaparte Coast	9	NT4	-12.48	130.79
Central Indo-Pacific	Australia	Bonaparte Coast	9	NT12	-12.41	130.79
Central Indo-Pacific	Australia	Bonaparte Coast	9	NT3	-12.49	130.8
Central Indo-Pacific	Australia	Bonaparte Coast	9	NWS164	-15.07	124.33
Central Indo-Pacific	East Timor	Lesser Sunda	10	ET1	-8.56	125.5
Central Indo-Pacific	Indonesia	Lesser Sunda	10	BALI3	-8.28	115.6
Central Indo-Pacific	Indonesia	Lesser Sunda	10	BALI1	-8.28	115.59
Central Indo-Pacific	Indonesia	Lesser Sunda	10	BALI4	-8.28	115.59
Central Indo-Pacific	Indonesia	Lesser Sunda	10	BALI2	-8.28	115.59
Central Indo-Pacific	Indonesia	Lesser Sunda	10	FLORES1	-8.49	122.34
Central Indo-Pacific	Indonesia	Lesser Sunda	10	FLORES2	-8.45	122.33
Central Indo-Pacific	Indonesia	Lesser Sunda	10	FLORES4	-8.44	122.33
Central Indo-Pacific	Indonesia	Lesser Sunda	10	FLORES5	-8.48	122.46
Central Indo-Pacific	Indonesia	Lesser Sunda	10	FLORES3	-8.44	122.33
Central Indo-Pacific	Indonesia	Lesser Sunda	10	FLORES7	-8.48	122.48
Central Indo-Pacific	Australia	Central and Southern Great Barrier Reef	11	GBR111	-21.79	151.87
Central Indo-Pacific	Australia	Central and Southern Great Barrier Reef	11	GBR112	-21.79	151.88
Central Indo-Pacific	Australia	Central and Southern Great Barrier Reef	11	QLD141	-19.77	149.38
Central Indo-Pacific	Australia	Central and Southern Great Barrier Reef	11	QLD140	-19.81	149.42
Central Indo-Pacific	Australia	Central and Southern Great Barrier Reef	11	QLD139	-20.03	149.7
Central Indo-Pacific	Australia	Central and Southern Great Barrier Reef	11	QLD18	-20.06	148.92
Central Indo-Pacific	Australia	Central and Southern Great Barrier Reef	11	GBR26	-19.79	149.07
Central Indo-Pacific	Australia	Central and Southern Great Barrier Reef	11	GBR27	-19.8	149.08
Central Indo-Pacific	Australia	Central and Southern Great Barrier Reef	11	GBR21	-23.16	151.07
Central Indo-Pacific	Australia	Central and Southern Great Barrier Reef	11	GBR22	-23.16	151.07
Central Indo-Pacific	Australia	Central and Southern Great Barrier Reef	11	GBR139	-19.83	149.48
Central Indo-Pacific	Australia	Central and Southern Great Barrier Reef	11	QLD20	-20.04	148.88
Central Indo-Pacific	Australia	Central and Southern Great Barrier Reef	11	QLD63	-18.54	147.53
Central Indo-Pacific	Australia	Central and Southern Great Barrier Reef	11	GBR123	-20.8	149.26
Central Indo-Pacific	Australia	Central and Southern Great Barrier Reef	11	GBR99	-18.87	147.71
Central Indo-Pacific	Australia	Central and Southern Great Barrier Reef	11	GBR98	-18.87	147.71
Central Indo-Pacific	Australia	Central and Southern Great Barrier Reef	11	QLD22	-18.14	146.28
Central Indo-Pacific	Australia	Central and Southern Great Barrier Reef	11	AIMS8	-23.25	151.94
Central Indo-Pacific	Australia	Central and Southern Great Barrier Reef	11	AIMS7	-23.25	151.95
Central Indo-Pacific	Australia	Central and Southern Great Barrier Reef	11	AIMS9	-23.26	151.95
Central Indo-Pacific	Australia	Central and Southern Great Barrier Reef	11	QLD113	-20.07	148.93
Central Indo-Pacific	Australia	Central and Southern Great Barrier Reef	11	QLD16	-20.16	149.04
Central Indo-Pacific	Australia	Central and Southern Great Barrier Reef	11	QLD60	-18.66	147.7
Central Indo-Pacific	Australia	Central and Southern Great Barrier Reef	11	QLD61	-18.66	147.72
Central Indo-Pacific	Australia	Central and Southern Great Barrier Reef	11	QLD62	-18.65	147.71
Central Indo-Pacific	Australia	Central and Southern Great Barrier Reef	11	GBR126	-20.6	149.41
Central Indo-Pacific	Australia	Central and Southern Great Barrier Reef	11	QLD26	-18.04	146.18
Central Indo-Pacific	Australia	Central and Southern Great Barrier Reef	11	QLD137	-18.81	147.67
Central Indo-Pacific	Australia	Central and Southern Great Barrier Reef	11	QLD138	-18.82	147.67
Central Indo-Pacific	Australia	Central and Southern Great Barrier Reef	11	QLD65	-18.4	147.45
Central Indo-Pacific	Australia	Central and Southern Great Barrier Reef	11	GBR133	-20	148.88
Central Indo-Pacific	Australia	Central and Southern Great Barrier Reef	11	QLD28	-17.94	146.16
Central Indo-Pacific	Australia	Central and Southern Great Barrier Reef	11	QLD19	-20.05	148.9
Central Indo-Pacific	Australia	Central and Southern Great Barrier Reef	11	GBR36	-16.52	145.54
Central Indo-Pacific	Australia	Central and Southern Great Barrier Reef	11	AIMS4	-23.5	151.77
Central Indo-Pacific	Australia	Central and Southern Great Barrier Reef	11	AIMS5	-23.5	151.78
Central Indo-Pacific	Australia	Central and Southern Great Barrier Reef	11	AIMS6	-23.5	151.78
Central Indo-Pacific	Australia	Central and Southern Great Barrier Reef	11	GBR8	-23.85	152.37
Central Indo-Pacific	Australia	Central and Southern Great Barrier Reef	11	GBR9	-23.86	152.36
Central Indo-Pacific	Australia	Central and Southern Great Barrier Reef	11	GBR103	-19.27	148.35
Central Indo-Pacific	Australia	Central and Southern Great Barrier Reef	11	GBR104	-19.27	148.34
Central Indo-Pacific	Australia	Central and Southern Great Barrier Reef	11	GBR33	-16.93	145.98
Central Indo-Pacific	Australia	Central and Southern Great Barrier Reef	11	GBR34	-16.92	146
Central Indo-Pacific	Australia	Central and Southern Great Barrier Reef	11	GBR35	-16.99	146
Central Indo-Pacific	Australia	Central and Southern Great Barrier Reef	11	QLD133	-18.47	147.06
Central Indo-Pacific	Australia	Central and Southern Great Barrier Reef	11	QLD132	-18.48	147.06
Central Indo-Pacific	Australia	Central and Southern Great Barrier Reef	11	GBR118	-20.68	149.14
Central Indo-Pacific	Australia	Central and Southern Great Barrier Reef	11	COR8	-16.73	146.27
Central Indo-Pacific	Australia	Central and Southern Great Barrier Reef	11	GBR105	-19.52	148.72
Central Indo-Pacific	Australia	Central and Southern Great Barrier Reef	11	GBR106	-19.52	148.72
Central Indo-Pacific	Australia	Central and Southern Great Barrier Reef	11	QLD115	-16.46	145.59
Central Indo-Pacific	Australia	Central and Southern Great Barrier Reef	11	QLD114	-16.46	145.58
Central Indo-Pacific	Australia	Central and Southern Great Barrier Reef	11	QLD70	-18.65	147.4
Central Indo-Pacific	Australia	Central and Southern Great Barrier Reef	11	QLD136	-18.62	147.44
Central Indo-Pacific	Australia	Central and Southern Great Barrier Reef	11	QLD69	-18.65	147.4
Central Indo-Pacific	Australia	Central and Southern Great Barrier Reef	11	QLD6	-23.2	150.97
Central Indo-Pacific	Australia	Central and Southern Great Barrier Reef	11	GBR124	-20.81	149.25
Central Indo-Pacific	Australia	Central and Southern Great Barrier Reef	11	COR11	-16.53	145.99
Central Indo-Pacific	Australia	Central and Southern Great Barrier Reef	11	QLD121	-17.16	146.01
Central Indo-Pacific	Australia	Central and Southern Great Barrier Reef	11	QLD118	-17.16	146.01
Central Indo-Pacific	Australia	Central and Southern Great Barrier Reef	11	QLD119	-17.16	146.01
Central Indo-Pacific	Australia	Central and Southern Great Barrier Reef	11	GBR24	-19.81	149.13
Central Indo-Pacific	Australia	Central and Southern Great Barrier Reef	11	GBR25	-19.81	149.14
Central Indo-Pacific	Australia	Central and Southern Great Barrier Reef	11	GBR10	-23.67	152.29
Central Indo-Pacific	Australia	Central and Southern Great Barrier Reef	11	QLD23	-18.05	146.2
Central Indo-Pacific	Australia	Central and Southern Great Barrier Reef	11	GBR18	-23.2	150.97
Central Indo-Pacific	Australia	Central and Southern Great Barrier Reef	11	GBR19	-23.22	150.96
Central Indo-Pacific	Australia	Central and Southern Great Barrier Reef	11	QLD64	-18.41	147.45
Central Indo-Pacific	Australia	Central and Southern Great Barrier Reef	11	QLD131	-18.62	147.08
Central Indo-Pacific	Australia	Central and Southern Great Barrier Reef	11	QLD130	-18.63	147.08
Central Indo-Pacific	Australia	Central and Southern Great Barrier Reef	11	GBR100	-18.73	147.27
Central Indo-Pacific	Australia	Central and Southern Great Barrier Reef	11	GBR125	-20.9	149.4
Central Indo-Pacific	Australia	Central and Southern Great Barrier Reef	11	GBR127	-20.92	149.42
Central Indo-Pacific	Australia	Central and Southern Great Barrier Reef	11	GBR1	-23.9	152.41
Central Indo-Pacific	Australia	Central and Southern Great Barrier Reef	11	GBR4	-23.91	152.39
Central Indo-Pacific	Australia	Central and Southern Great Barrier Reef	11	GBR3	-23.9	152.39
Central Indo-Pacific	Australia	Central and Southern Great Barrier Reef	11	GBR5	-23.9	152.4
Central Indo-Pacific	Australia	Central and Southern Great Barrier Reef	11	QLD17	-20.08	148.88
Central Indo-Pacific	Australia	Central and Southern Great Barrier Reef	11	QLD134	-18.46	147
Central Indo-Pacific	Australia	Central and Southern Great Barrier Reef	11	QLD135	-18.46	147
Central Indo-Pacific	Australia	Central and Southern Great Barrier Reef	11	GBR128	-20.56	150.03
Central Indo-Pacific	Australia	Central and Southern Great Barrier Reef	11	GBR129	-20.57	150.03
Central Indo-Pacific	Australia	Central and Southern Great Barrier Reef	11	GBR70	-16.38	145.57
Central Indo-Pacific	Australia	Central and Southern Great Barrier Reef	11	GBR71	-16.39	145.57
Central Indo-Pacific	Australia	Central and Southern Great Barrier Reef	11	GBR72	-16.39	145.57
Central Indo-Pacific	Australia	Central and Southern Great Barrier Reef	11	GBR134	-20.07	148.95
Central Indo-Pacific	Australia	Central and Southern Great Barrier Reef	11	QLD59	-18.73	147.72
Central Indo-Pacific	Australia	Central and Southern Great Barrier Reef	11	GBR136	-20.09	148.95
Central Indo-Pacific	Australia	Central and Southern Great Barrier Reef	11	AIMS2	-23.53	151.75
Central Indo-Pacific	Australia	Central and Southern Great Barrier Reef	11	AIMS3	-23.53	151.75
Central Indo-Pacific	Australia	Central and Southern Great Barrier Reef	11	AIMS1	-23.54	151.76
Central Indo-Pacific	Australia	Central and Southern Great Barrier Reef	11	QLD142	-16.55	146.04
Central Indo-Pacific	Australia	Central and Southern Great Barrier Reef	11	QLD143	-16.55	146.04
Central Indo-Pacific	Australia	Central and Southern Great Barrier Reef	11	GBR73	-16.55	146.05
Central Indo-Pacific	Australia	Central and Southern Great Barrier Reef	11	GBR74	-16.55	146.05
Central Indo-Pacific	Australia	Central and Southern Great Barrier Reef	11	GBR75	-16.56	146.06
Central Indo-Pacific	Australia	Central and Southern Great Barrier Reef	11	COR10	-16.6	145.97
Central Indo-Pacific	Australia	Central and Southern Great Barrier Reef	11	GBR20	-23.16	150.92
Central Indo-Pacific	Australia	Central and Southern Great Barrier Reef	11	GBR110	-21.65	150.24
Central Indo-Pacific	Australia	Central and Southern Great Barrier Reef	11	GBR108	-21.64	150.25
Central Indo-Pacific	Australia	Central and Southern Great Barrier Reef	11	GBR109	-21.65	150.24
Central Indo-Pacific	Australia	Central and Southern Great Barrier Reef	11	QLD7	-23.2	150.94
Central Indo-Pacific	Australia	Central and Southern Great Barrier Reef	11	COR2	-16.89	146.19
Central Indo-Pacific	Australia	Central and Southern Great Barrier Reef	11	QLD116	-16.87	146.24
Central Indo-Pacific	Australia	Central and Southern Great Barrier Reef	11	QLD117	-16.85	146.24
Central Indo-Pacific	Australia	Central and Southern Great Barrier Reef	11	QLD29	-17.77	146.45
Central Indo-Pacific	Australia	Central and Southern Great Barrier Reef	11	QLD67	-18.27	147.38
Central Indo-Pacific	Australia	Central and Southern Great Barrier Reef	11	QLD66	-18.27	147.38
Central Indo-Pacific	Australia	Central and Southern Great Barrier Reef	11	QLD68	-18.26	147.38
Central Indo-Pacific	Australia	Central and Southern Great Barrier Reef	11	GBR32	-17.52	146.5
Central Indo-Pacific	Australia	Central and Southern Great Barrier Reef	11	GBR30	-17.52	146.5
Central Indo-Pacific	Australia	Central and Southern Great Barrier Reef	11	GBR31	-17.52	146.5
Central Indo-Pacific	Australia	Central and Southern Great Barrier Reef	11	COR3	-16.43	145.99
Central Indo-Pacific	Australia	Central and Southern Great Barrier Reef	11	AIMS10	-23.18	151.91
Central Indo-Pacific	Australia	Central and Southern Great Barrier Reef	11	AIMS11	-23.18	151.91
Central Indo-Pacific	Australia	Central and Southern Great Barrier Reef	11	AIMS12	-23.18	151.92
Central Indo-Pacific	Australia	Central and Southern Great Barrier Reef	11	GBR13	-23.3	151.69
Central Indo-Pacific	Australia	Central and Southern Great Barrier Reef	11	GBR14	-23.3	151.7
Central Indo-Pacific	Australia	Central and Southern Great Barrier Reef	11	GBR15	-23.3	151.69
Central Indo-Pacific	Australia	Central and Southern Great Barrier Reef	11	QLD13	-23.16	150.92
Central Indo-Pacific	Australia	Central and Southern Great Barrier Reef	11	GBR113	-21.84	152.33
Central Indo-Pacific	Australia	Central and Southern Great Barrier Reef	11	QLD123	-17.47	146.41
Central Indo-Pacific	Australia	Central and Southern Great Barrier Reef	11	QLD122	-17.47	146.41
Central Indo-Pacific	Australia	Central and Southern Great Barrier Reef	11	GBR122	-20.8	149.27
Central Indo-Pacific	Australia	Central and Southern Great Barrier Reef	11	GBR28	-18.57	146.48
Central Indo-Pacific	Australia	Central and Southern Great Barrier Reef	11	COR4	-16.79	146.27
Central Indo-Pacific	Australia	Central and Southern Great Barrier Reef	11	GBR114	-21.96	152.43
Central Indo-Pacific	Australia	Central and Southern Great Barrier Reef	11	GBR23	-20.38	148.89
Central Indo-Pacific	Australia	Central and Southern Great Barrier Reef	11	QLD125	-18.47	146.88
Central Indo-Pacific	Australia	Central and Southern Great Barrier Reef	11	QLD124	-18.48	146.88
Central Indo-Pacific	Australia	Central and Southern Great Barrier Reef	11	QLD32	-17.22	146.09
Central Indo-Pacific	Australia	Central and Southern Great Barrier Reef	11	GBR117	-19.97	149.62
Central Indo-Pacific	Australia	Central and Southern Great Barrier Reef	11	QLD127	-18.44	147.06
Central Indo-Pacific	Australia	Central and Southern Great Barrier Reef	11	QLD126	-18.43	147.06
Central Indo-Pacific	Australia	Central and Southern Great Barrier Reef	11	QLD30	-17.23	146.09
Central Indo-Pacific	Australia	Central and Southern Great Barrier Reef	11	GBR138	-20.11	148.96
Central Indo-Pacific	Australia	Central and Southern Great Barrier Reef	11	CS47	-21.9	153.59
Central Indo-Pacific	Australia	Central and Southern Great Barrier Reef	11	CS49	-21.9	153.54
Central Indo-Pacific	Australia	Central and Southern Great Barrier Reef	11	CS51	-21.92	153.59
Central Indo-Pacific	Australia	Central and Southern Great Barrier Reef	11	CS50	-21.92	153.58
Central Indo-Pacific	Australia	Central and Southern Great Barrier Reef	11	CS46	-21.85	153.52
Central Indo-Pacific	Australia	Central and Southern Great Barrier Reef	11	CS48	-21.9	153.54
Central Indo-Pacific	Australia	Central and Southern Great Barrier Reef	11	QLD27	-18.04	146.2
Central Indo-Pacific	Australia	Central and Southern Great Barrier Reef	11	QLD24	-18.04	146.2
Central Indo-Pacific	Australia	Central and Southern Great Barrier Reef	11	GBR131	-20.05	148.88
Central Indo-Pacific	Australia	Central and Southern Great Barrier Reef	11	QLD35	-20.09	148.91
Central Indo-Pacific	Australia	Central and Southern Great Barrier Reef	11	QLD72	-22.38	152.53
Central Indo-Pacific	Australia	Central and Southern Great Barrier Reef	11	QLD73	-22.37	152.55
Central Indo-Pacific	Australia	Central and Southern Great Barrier Reef	11	GBR94	-22.37	152.54
Central Indo-Pacific	Australia	Central and Southern Great Barrier Reef	11	COR5	-16.79	146.27
Central Indo-Pacific	Australia	Central and Southern Great Barrier Reef	11	COR7	-16.73	146.27
Central Indo-Pacific	Australia	Central and Southern Great Barrier Reef	11	GBR101	-19.1	148.28
Central Indo-Pacific	Australia	Central and Southern Great Barrier Reef	11	GBR102	-19.1	148.28
Central Indo-Pacific	Australia	Central and Southern Great Barrier Reef	11	COR9	-16.73	146.27
Central Indo-Pacific	Australia	Central and Southern Great Barrier Reef	11	GBR16	-23.25	151.77
Central Indo-Pacific	Australia	Central and Southern Great Barrier Reef	11	GBR17	-23.24	151.78
Central Indo-Pacific	Australia	Central and Southern Great Barrier Reef	11	COR6	-16.78	146.27
Central Indo-Pacific	Australia	Central and Southern Great Barrier Reef	11	GBR12	-23.47	151.85
Central Indo-Pacific	Cambodia	Gulf of Thailand	12	CAM7	10.62	103.29
Central Indo-Pacific	Cambodia	Gulf of Thailand	12	CAM6	10.73	102.87
Central Indo-Pacific	Cambodia	Gulf of Thailand	12	CAM5	10.73	102.87
Central Indo-Pacific	Cambodia	Gulf of Thailand	12	CAM8	10.62	103.3
Central Indo-Pacific	Cambodia	Gulf of Thailand	12	CAM2	10.66	103.29
Central Indo-Pacific	Australia	Exmouth to Broome	13	NWS181	-12.19	123.08
Central Indo-Pacific	Australia	Exmouth to Broome	13	NWS184	-12.18	123.07
Central Indo-Pacific	Australia	Exmouth to Broome	13	NWS183	-12.18	123.07
Central Indo-Pacific	Australia	Exmouth to Broome	13	NWS182	-12.17	123.06
Central Indo-Pacific	Australia	Exmouth to Broome	13	NWS148	-20.78	115.53
Central Indo-Pacific	Australia	Exmouth to Broome	13	NWS149	-20.76	115.57
Central Indo-Pacific	Australia	Exmouth to Broome	13	NWS106	-19.59	119.11
Central Indo-Pacific	Australia	Exmouth to Broome	13	NWS104	-19.58	119.11
Central Indo-Pacific	Australia	Exmouth to Broome	13	NWS7	-11.97	123.36
Central Indo-Pacific	Australia	Exmouth to Broome	13	NWS89	-17.25	119.36
Central Indo-Pacific	Australia	Exmouth to Broome	13	NWS196	-14.1	123.55
Central Indo-Pacific	Australia	Exmouth to Broome	13	NWS195	-14.11	123.56
Central Indo-Pacific	Australia	Exmouth to Broome	13	NWS194	-14.1	123.55
Central Indo-Pacific	Australia	Exmouth to Broome	13	NMP-B3	-21.83	114.18
Central Indo-Pacific	Australia	Exmouth to Broome	13	NWS160	-21.94	114.16
Central Indo-Pacific	Australia	Exmouth to Broome	13	NMP-BF2	-21.85	114.17
Central Indo-Pacific	Australia	Exmouth to Broome	13	NMP-BF3	-21.87	114.16
Central Indo-Pacific	Australia	Exmouth to Broome	13	NWS18	-12.24	122.98
Central Indo-Pacific	Australia	Exmouth to Broome	13	NWS3	-11.97	123.39
Central Indo-Pacific	Australia	Exmouth to Broome	13	NWS192	-12.53	123.58
Central Indo-Pacific	Australia	Exmouth to Broome	13	NWS189	-12.53	123.57
Central Indo-Pacific	Australia	Exmouth to Broome	13	NWS193	-12.52	123.56
Central Indo-Pacific	Australia	Exmouth to Broome	13	NWS186	-12.53	123.58
Central Indo-Pacific	Australia	Exmouth to Broome	13	NWS188	-12.53	123.58
Central Indo-Pacific	Australia	Exmouth to Broome	13	NWS187	-12.53	123.58
Central Indo-Pacific	Australia	Exmouth to Broome	13	NWS38	-14.07	121.78
Central Indo-Pacific	Australia	Exmouth to Broome	13	NWS86	-17.29	119.38
Central Indo-Pacific	Australia	Exmouth to Broome	13	NWS87	-17.28	119.38
Central Indo-Pacific	Australia	Exmouth to Broome	13	NWS88	-17.29	119.38
Central Indo-Pacific	Australia	Exmouth to Broome	13	NWS95	-17.31	119.37
Central Indo-Pacific	Australia	Exmouth to Broome	13	NWS83	-17.25	119.35
Central Indo-Pacific	Australia	Exmouth to Broome	13	NWS84	-17.25	119.35
Central Indo-Pacific	Australia	Exmouth to Broome	13	NWS101	-17.36	119.38
Central Indo-Pacific	Australia	Exmouth to Broome	13	NWS85	-17.25	119.35
Central Indo-Pacific	Australia	Exmouth to Broome	13	NWS92	-17.28	119.37
Central Indo-Pacific	Australia	Exmouth to Broome	13	NWS94	-17.3	119.34
Central Indo-Pacific	Australia	Exmouth to Broome	13	NWS28	-14.13	121.94
Central Indo-Pacific	Australia	Exmouth to Broome	13	WA65	-20.62	116.51
Central Indo-Pacific	Australia	Exmouth to Broome	13	NWS41	-14.11	121.72
Central Indo-Pacific	Australia	Exmouth to Broome	13	NWS114	-20.44	117.1
Central Indo-Pacific	Australia	Exmouth to Broome	13	NWS115	-20.43	117.1
Central Indo-Pacific	Australia	Exmouth to Broome	13	NWS116	-20.43	117.06
Central Indo-Pacific	Australia	Exmouth to Broome	13	WA72	-20.58	116.57
Central Indo-Pacific	Australia	Exmouth to Broome	13	NWS22	-12.24	122.99
Central Indo-Pacific	Australia	Exmouth to Broome	13	WA67	-20.61	116.46
Central Indo-Pacific	Australia	Exmouth to Broome	13	WA68	-20.61	116.46
Central Indo-Pacific	Australia	Exmouth to Broome	13	NWS25	-12.24	122.99
Central Indo-Pacific	Australia	Exmouth to Broome	13	NWS36	-14.07	121.79
Central Indo-Pacific	Australia	Exmouth to Broome	13	NWS112	-20.25	117.91
Central Indo-Pacific	Australia	Exmouth to Broome	13	NWS113	-20.26	117.88
Central Indo-Pacific	Australia	Exmouth to Broome	13	NWS32	-14.11	121.96
Central Indo-Pacific	Australia	Exmouth to Broome	13	NWS13	-11.98	123.33
Central Indo-Pacific	Australia	Exmouth to Broome	13	NWS124	-20.53	116.54
Central Indo-Pacific	Australia	Exmouth to Broome	13	WA79	-20.54	116.53
Central Indo-Pacific	Australia	Exmouth to Broome	13	WA78	-20.54	116.53
Central Indo-Pacific	Australia	Exmouth to Broome	13	NWS19	-12.24	122.98
Central Indo-Pacific	Australia	Exmouth to Broome	13	NWS16	-12.24	122.98
Central Indo-Pacific	Australia	Exmouth to Broome	13	NWS110	-20.12	118.47
Central Indo-Pacific	Australia	Exmouth to Broome	13	NWS21	-12.24	123
Central Indo-Pacific	Australia	Exmouth to Broome	13	NWS12	-11.98	123.34
Central Indo-Pacific	Australia	Exmouth to Broome	13	NWS5	-11.98	123.38
Central Indo-Pacific	Australia	Exmouth to Broome	13	NWS6	-11.97	123.38
Central Indo-Pacific	Australia	Exmouth to Broome	13	NWS8	-11.98	123.36
Central Indo-Pacific	Australia	Exmouth to Broome	13	NWS35	-14.07	121.95
Central Indo-Pacific	Australia	Exmouth to Broome	13	NWS62	-17.51	118.97
Central Indo-Pacific	Australia	Exmouth to Broome	13	NWS55	-17.57	118.97
Central Indo-Pacific	Australia	Exmouth to Broome	13	NWS57	-17.55	118.97
Central Indo-Pacific	Australia	Exmouth to Broome	13	NWS61	-17.56	118.97
Central Indo-Pacific	Australia	Exmouth to Broome	13	NWS59	-17.55	118.97
Central Indo-Pacific	Australia	Exmouth to Broome	13	NWS63	-17.5	118.96
Central Indo-Pacific	Australia	Exmouth to Broome	13	NWS56	-17.61	118.97
Central Indo-Pacific	Australia	Exmouth to Broome	13	NWS52	-17.61	118.96
Central Indo-Pacific	Australia	Exmouth to Broome	13	NWS51	-17.61	118.96
Central Indo-Pacific	Australia	Exmouth to Broome	13	NWS109	-20.29	118.48
Central Indo-Pacific	Australia	Exmouth to Broome	13	NWS23	-12.23	122.99
Central Indo-Pacific	Australia	Exmouth to Broome	13	NWS117	-20.4	116.92
Central Indo-Pacific	Australia	Exmouth to Broome	13	NWS118	-20.4	116.93
Central Indo-Pacific	Australia	Exmouth to Broome	13	WA66	-20.62	116.52
Central Indo-Pacific	Australia	Exmouth to Broome	13	NWS30	-14.14	121.96
Central Indo-Pacific	Australia	Exmouth to Broome	13	WA80	-20.53	116.66
Central Indo-Pacific	Australia	Exmouth to Broome	13	NWS67	-17.07	119.65
Central Indo-Pacific	Australia	Exmouth to Broome	13	NWS69	-17.07	119.65
Central Indo-Pacific	Australia	Exmouth to Broome	13	NWS66	-17.08	119.65
Central Indo-Pacific	Australia	Exmouth to Broome	13	NWS76	-17.11	119.63
Central Indo-Pacific	Australia	Exmouth to Broome	13	NWS78	-17.07	119.64
Central Indo-Pacific	Australia	Exmouth to Broome	13	NWS73	-17.07	119.64
Central Indo-Pacific	Australia	Exmouth to Broome	13	NWS79	-17.07	119.65
Central Indo-Pacific	Australia	Exmouth to Broome	13	NWS74	-17.07	119.64
Central Indo-Pacific	Australia	Exmouth to Broome	13	NWS81	-17.03	119.62
Central Indo-Pacific	Australia	Exmouth to Broome	13	NWS77	-17.06	119.65
Central Indo-Pacific	Australia	Exmouth to Broome	13	NWS72	-17.08	119.65
Central Indo-Pacific	Australia	Exmouth to Broome	13	NWS80	-17.08	119.66
Central Indo-Pacific	Australia	Exmouth to Broome	13	NWS71	-17.15	119.63
Central Indo-Pacific	Australia	Exmouth to Broome	13	NWS68	-17.06	119.65
Central Indo-Pacific	Australia	Exmouth to Broome	13	NWS65	-17.16	119.63
Central Indo-Pacific	Australia	Exmouth to Broome	13	NWS70	-17.13	119.63
Central Indo-Pacific	Australia	Exmouth to Broome	13	NWS82	-17.08	119.6
Central Indo-Pacific	Australia	Exmouth to Broome	13	NWS75	-17.09	119.61
Central Indo-Pacific	Australia	Exmouth to Broome	13	NWS127	-20.45	115.61
Central Indo-Pacific	Australia	Exmouth to Broome	13	NWS137	-20.51	115.56
Central Indo-Pacific	Australia	Exmouth to Broome	13	NWS29	-14.13	121.95
Central Indo-Pacific	Australia	Exmouth to Broome	13	NWS31	-14.14	121.96
Central Indo-Pacific	Australia	Exmouth to Broome	13	NWS33	-14.06	121.96
Central Indo-Pacific	Australia	Exmouth to Broome	13	NWS158	-21.65	114.38
Central Indo-Pacific	Australia	Exmouth to Broome	13	NWS157	-21.64	114.39
Central Indo-Pacific	Australia	Exmouth to Broome	13	NWS175	-13.92	121.91
Central Indo-Pacific	Australia	Exmouth to Broome	13	NWS174	-13.93	121.9
Central Indo-Pacific	Australia	Exmouth to Broome	13	NWS133	-20.37	115.51
Central Indo-Pacific	Australia	Exmouth to Broome	13	NWS185	-12.18	123.11
Central Indo-Pacific	Australia	Exmouth to Broome	13	NMP16	-21.64	114.36
Central Indo-Pacific	Australia	Exmouth to Broome	13	NWS190	-12.52	123.57
Central Indo-Pacific	Australia	Exmouth to Broome	13	NWS39	-14.08	121.75
Central Indo-Pacific	Australia	Exmouth to Broome	13	NWS108	-20.21	118.53
Central Indo-Pacific	Australia	Exmouth to Broome	13	WA82	-20.21	118.53
Central Indo-Pacific	Australia	Exmouth to Broome	13	NWS24	-12.24	122.99
Central Indo-Pacific	Australia	Exmouth to Broome	13	NWS161	-22.02	114.13
Central Indo-Pacific	Australia	Exmouth to Broome	13	NWS10	-11.97	123.32
Central Indo-Pacific	Australia	Exmouth to Broome	13	NWS58	-17.55	118.97
Central Indo-Pacific	Australia	Exmouth to Broome	13	WA75	-20.57	116.61
Central Indo-Pacific	Australia	Exmouth to Broome	13	NWS121	-20.46	116.59
Central Indo-Pacific	Australia	Exmouth to Broome	13	NWS172	-14.07	121.97
Central Indo-Pacific	Australia	Exmouth to Broome	13	NWS162	-22.02	114.13
Central Indo-Pacific	Australia	Exmouth to Broome	13	NWS177	-13.63	122.02
Central Indo-Pacific	Australia	Exmouth to Broome	13	NWS26	-13.62	121.99
Central Indo-Pacific	Australia	Exmouth to Broome	13	NWS176	-13.62	122.01
Central Indo-Pacific	Australia	Exmouth to Broome	13	NWS173	-14.13	121.97
Central Indo-Pacific	Australia	Exmouth to Broome	13	NWS96	-17.32	119.36
Central Indo-Pacific	Australia	Exmouth to Broome	13	NWS159	-21.67	114.35
Central Indo-Pacific	Australia	Exmouth to Broome	13	NWS9	-11.97	123.34
Central Indo-Pacific	Australia	Exmouth to Broome	13	NWS37	-14.05	121.78
Central Indo-Pacific	Australia	Exmouth to Broome	13	NMP17	-21.67	114.33
Central Indo-Pacific	Australia	Exmouth to Broome	13	WA69	-20.61	116.6
Central Indo-Pacific	Australia	Exmouth to Broome	13	NWS34	-14.06	121.97
Central Indo-Pacific	Australia	Exmouth to Broome	13	NWS4	-11.97	123.38
Central Indo-Pacific	Australia	Exmouth to Broome	13	NWS17	-12.24	122.99
Central Indo-Pacific	Australia	Exmouth to Broome	13	NWS191	-12.52	123.56
Central Indo-Pacific	Australia	Exmouth to Broome	13	NWS144	-20.63	115.58
Central Indo-Pacific	Australia	Exmouth to Broome	13	NWS142	-20.55	115.57
Central Indo-Pacific	Australia	Exmouth to Broome	13	NWS141	-20.56	115.57
Central Indo-Pacific	Australia	Exmouth to Broome	13	NWS143	-20.58	115.58
Central Indo-Pacific	Australia	Arnhem Coast to Gulf of Carpentaria	14	NT32	-11.45	133.71
Central Indo-Pacific	Australia	Arnhem Coast to Gulf of Carpentaria	14	NT30	-11.29	133.8
Central Indo-Pacific	Australia	Arnhem Coast to Gulf of Carpentaria	14	NT31	-11.3	133.8
Central Indo-Pacific	Australia	Arnhem Coast to Gulf of Carpentaria	14	NT49	-12.06	136.61
Central Indo-Pacific	Australia	Arnhem Coast to Gulf of Carpentaria	14	NT50	-12.06	136.61
Central Indo-Pacific	Australia	Arnhem Coast to Gulf of Carpentaria	14	QLD36	-16.42	139.47
Central Indo-Pacific	Australia	Arnhem Coast to Gulf of Carpentaria	14	NT55	-13.68	136.45
Central Indo-Pacific	Australia	Arnhem Coast to Gulf of Carpentaria	14	NT24	-10.89	132.78
Central Indo-Pacific	Australia	Arnhem Coast to Gulf of Carpentaria	14	NT48	-12.09	136.83
Central Indo-Pacific	Australia	Arnhem Coast to Gulf of Carpentaria	14	NT43	-11.62	136.88
Central Indo-Pacific	Australia	Arnhem Coast to Gulf of Carpentaria	14	NT102	-11.22	136.69
Central Indo-Pacific	Australia	Arnhem Coast to Gulf of Carpentaria	14	NT59	-14.35	136.94
Central Indo-Pacific	Australia	Arnhem Coast to Gulf of Carpentaria	14	NT57	-14.31	136.89
Central Indo-Pacific	Australia	Arnhem Coast to Gulf of Carpentaria	14	NT56	-14.31	136.89
Central Indo-Pacific	Australia	Arnhem Coast to Gulf of Carpentaria	14	NT53	-12.88	136.73
Central Indo-Pacific	Australia	Arnhem Coast to Gulf of Carpentaria	14	NT52	-12.89	136.73
Central Indo-Pacific	Australia	Arnhem Coast to Gulf of Carpentaria	14	NT54	-12.88	136.71
Central Indo-Pacific	Australia	Arnhem Coast to Gulf of Carpentaria	14	QLD83	-16.24	139.6
Central Indo-Pacific	Australia	Arnhem Coast to Gulf of Carpentaria	14	NT36	-11.55	136.42
Central Indo-Pacific	Australia	Arnhem Coast to Gulf of Carpentaria	14	QLD37	-16.41	139.63
Central Indo-Pacific	Australia	Arnhem Coast to Gulf of Carpentaria	14	QLD38	-16.39	139.63
Central Indo-Pacific	Australia	Arnhem Coast to Gulf of Carpentaria	14	QLD42	-16.23	139.25
Central Indo-Pacific	Australia	Arnhem Coast to Gulf of Carpentaria	14	NT22	-10.32	132.71
Central Indo-Pacific	Australia	Arnhem Coast to Gulf of Carpentaria	14	NT20	-10.32	132.71
Central Indo-Pacific	Australia	Arnhem Coast to Gulf of Carpentaria	14	NT21	-10.33	132.71
Central Indo-Pacific	Australia	Arnhem Coast to Gulf of Carpentaria	14	NT25	-10.91	133.02
Central Indo-Pacific	Australia	Arnhem Coast to Gulf of Carpentaria	14	NT27	-10.91	133.04
Central Indo-Pacific	Australia	Arnhem Coast to Gulf of Carpentaria	14	NT26	-10.9	133.03
Central Indo-Pacific	Australia	Arnhem Coast to Gulf of Carpentaria	14	NT28	-10.9	133.03
Central Indo-Pacific	Australia	Arnhem Coast to Gulf of Carpentaria	14	NT29	-10.91	133.03
Central Indo-Pacific	Australia	Arnhem Coast to Gulf of Carpentaria	14	NT103	-11.23	136.69
Central Indo-Pacific	Australia	Arnhem Coast to Gulf of Carpentaria	14	NT33	-11.43	134.13
Central Indo-Pacific	Australia	Arnhem Coast to Gulf of Carpentaria	14	NT34	-11.44	134.14
Central Indo-Pacific	Australia	Arnhem Coast to Gulf of Carpentaria	14	NT42	-11.61	136.89
Central Indo-Pacific	Australia	Arnhem Coast to Gulf of Carpentaria	14	QLD41	-16.29	139.42
Central Indo-Pacific	Australia	Arnhem Coast to Gulf of Carpentaria	14	QLD40	-16.38	139.6
Central Indo-Pacific	Australia	Arnhem Coast to Gulf of Carpentaria	14	NT41	-11.63	136.93
Central Indo-Pacific	Australia	Arnhem Coast to Gulf of Carpentaria	14	NT40	-11.65	136.91
Central Indo-Pacific	Australia	Arnhem Coast to Gulf of Carpentaria	14	NT38	-11.66	136.83
Central Indo-Pacific	Australia	Arnhem Coast to Gulf of Carpentaria	14	NT39	-11.68	136.82
Central Indo-Pacific	Australia	Arnhem Coast to Gulf of Carpentaria	14	NT37	-11.67	136.81
Central Indo-Pacific	Australia	Cocos-Keeling/Christmas Island	15	CI4	-10.42	105.67
Central Indo-Pacific	Australia	Cocos-Keeling/Christmas Island	15	CI9	-10.46	105.71
Central Indo-Pacific	Australia	Cocos-Keeling/Christmas Island	15	CI12	-10.46	105.71
Central Indo-Pacific	Australia	Cocos-Keeling/Christmas Island	15	CI1	-10.43	105.67
Central Indo-Pacific	Australia	Cocos-Keeling/Christmas Island	15	NT1	-10.43	105.67
Central Indo-Pacific	Australia	Cocos-Keeling/Christmas Island	15	CI10	-10.42	105.67
Central Indo-Pacific	Australia	Cocos-Keeling/Christmas Island	15	NT7	-10.46	105.63
Central Indo-Pacific	Australia	Cocos-Keeling/Christmas Island	15	CI7	-10.46	105.64
Central Indo-Pacific	Australia	Cocos-Keeling/Christmas Island	15	CI8	-10.47	105.56
Central Indo-Pacific	Australia	Cocos-Keeling/Christmas Island	15	CI2	-10.43	105.67
Central Indo-Pacific	Australia	Cocos-Keeling/Christmas Island	15	CI3	-10.43	105.67
Central Indo-Pacific	Australia	Cocos-Keeling/Christmas Island	15	CI6	-10.46	105.58
Central Indo-Pacific	Australia	Cocos-Keeling/Christmas Island	15	NT6	-10.46	105.58
Central Indo-Pacific	Australia	Torres Strait Northern Great Barrier Reef	16	COR12	-15.98	145.83
Central Indo-Pacific	Australia	Torres Strait Northern Great Barrier Reef	16	COR13	-15.97	145.82
Central Indo-Pacific	Australia	Torres Strait Northern Great Barrier Reef	16	COR14	-15.96	145.8
Central Indo-Pacific	Australia	Torres Strait Northern Great Barrier Reef	16	CS197	-10.23	144.59
Central Indo-Pacific	Australia	Torres Strait Northern Great Barrier Reef	16	CS196	-10.22	144.59
Central Indo-Pacific	Australia	Torres Strait Northern Great Barrier Reef	16	CS198	-10.23	144.59
Central Indo-Pacific	Australia	Torres Strait Northern Great Barrier Reef	16	CS195	-10.22	144.6
Central Indo-Pacific	Australia	Torres Strait Northern Great Barrier Reef	16	CS199	-10.14	144.44
Central Indo-Pacific	Australia	Torres Strait Northern Great Barrier Reef	16	CS190	-10.3	144.52
Central Indo-Pacific	Australia	Torres Strait Northern Great Barrier Reef	16	CS212	-10.15	144.57
Central Indo-Pacific	Australia	Torres Strait Northern Great Barrier Reef	16	CS213	-10.15	144.58
Central Indo-Pacific	Australia	Torres Strait Northern Great Barrier Reef	16	CS201	-10.08	144.47
Central Indo-Pacific	Australia	Torres Strait Northern Great Barrier Reef	16	CS202	-10.07	144.52
Central Indo-Pacific	Australia	Torres Strait Northern Great Barrier Reef	16	CS200	-10.12	144.46
Central Indo-Pacific	Australia	Torres Strait Northern Great Barrier Reef	16	CS188	-10.44	144.43
Central Indo-Pacific	Australia	Torres Strait Northern Great Barrier Reef	16	CS191	-10.37	144.53
Central Indo-Pacific	Australia	Torres Strait Northern Great Barrier Reef	16	CS186	-10.43	144.45
Central Indo-Pacific	Australia	Torres Strait Northern Great Barrier Reef	16	QLD44	-14.69	145.47
Central Indo-Pacific	Australia	Torres Strait Northern Great Barrier Reef	16	QLD43	-14.69	145.46
Central Indo-Pacific	Australia	Torres Strait Northern Great Barrier Reef	16	QLD46	-14.69	145.47
Central Indo-Pacific	Australia	Torres Strait Northern Great Barrier Reef	16	QLD87	-10.6	141.91
Central Indo-Pacific	Australia	Torres Strait Northern Great Barrier Reef	16	QLD86	-10.61	141.91
Central Indo-Pacific	Australia	Torres Strait Northern Great Barrier Reef	16	QLD96	-9.88	142.49
Central Indo-Pacific	Australia	Torres Strait Northern Great Barrier Reef	16	QLD95	-9.88	143.48
Central Indo-Pacific	Australia	Torres Strait Northern Great Barrier Reef	16	GBR89	-11.49	143.85
Central Indo-Pacific	Australia	Torres Strait Northern Great Barrier Reef	16	GBR88	-11.49	143.85
Central Indo-Pacific	Australia	Torres Strait Northern Great Barrier Reef	16	GBR58	-12.63	143.58
Central Indo-Pacific	Australia	Torres Strait Northern Great Barrier Reef	16	GBR79	-12.63	143.58
Central Indo-Pacific	Australia	Torres Strait Northern Great Barrier Reef	16	GBR61	-12	143.84
Central Indo-Pacific	Australia	Torres Strait Northern Great Barrier Reef	16	GBR77	-16.21	145.78
Central Indo-Pacific	Australia	Torres Strait Northern Great Barrier Reef	16	QLD54	-14.65	145.45
Central Indo-Pacific	Australia	Torres Strait Northern Great Barrier Reef	16	GBR39	-14.66	145.66
Central Indo-Pacific	Australia	Torres Strait Northern Great Barrier Reef	16	GBR86	-11.23	143.35
Central Indo-Pacific	Australia	Torres Strait Northern Great Barrier Reef	16	GBR62	-13.82	144.28
Central Indo-Pacific	Australia	Torres Strait Northern Great Barrier Reef	16	CS218	-10.19	144.41
Central Indo-Pacific	Australia	Torres Strait Northern Great Barrier Reef	16	GBR96	-14.51	145.52
Central Indo-Pacific	Australia	Torres Strait Northern Great Barrier Reef	16	GBR67	-14.52	145.53
Central Indo-Pacific	Australia	Torres Strait Northern Great Barrier Reef	16	GBR66	-14.49	145.55
Central Indo-Pacific	Australia	Torres Strait Northern Great Barrier Reef	16	GBR91	-11.98	143.65
Central Indo-Pacific	Australia	Torres Strait Northern Great Barrier Reef	16	QLD104	-9.94	144.02
Central Indo-Pacific	Australia	Torres Strait Northern Great Barrier Reef	16	QLD112	-10.52	143.09
Central Indo-Pacific	Australia	Torres Strait Northern Great Barrier Reef	16	QLD111	-10.52	143.09
Central Indo-Pacific	Australia	Torres Strait Northern Great Barrier Reef	16	GBR47	-12.28	143.41
Central Indo-Pacific	Australia	Torres Strait Northern Great Barrier Reef	16	GBR48	-12.28	143.4
Central Indo-Pacific	Australia	Torres Strait Northern Great Barrier Reef	16	GBR49	-12.29	143.4
Central Indo-Pacific	Australia	Torres Strait Northern Great Barrier Reef	16	GBR46	-12.28	143.41
Central Indo-Pacific	Australia	Torres Strait Northern Great Barrier Reef	16	GBR93	-12.3	143.42
Central Indo-Pacific	Australia	Torres Strait Northern Great Barrier Reef	16	GBR45	-12.29	143.4
Central Indo-Pacific	Australia	Torres Strait Northern Great Barrier Reef	16	GBR92	-12.16	143.65
Central Indo-Pacific	Australia	Torres Strait Northern Great Barrier Reef	16	CS215	-10.23	144.41
Central Indo-Pacific	Australia	Torres Strait Northern Great Barrier Reef	16	CS216	-10.23	144.41
Central Indo-Pacific	Australia	Torres Strait Northern Great Barrier Reef	16	CS214	-10.14	144.57
Central Indo-Pacific	Australia	Torres Strait Northern Great Barrier Reef	16	QLD97	-9.86	143.59
Central Indo-Pacific	Australia	Torres Strait Northern Great Barrier Reef	16	NQ2	-13.96	143.84
Central Indo-Pacific	Australia	Torres Strait Northern Great Barrier Reef	16	NQ1	-13.96	143.84
Central Indo-Pacific	Australia	Torres Strait Northern Great Barrier Reef	16	CS211	-10.14	144.58
Central Indo-Pacific	Australia	Torres Strait Northern Great Barrier Reef	16	GBR57	-12.38	143.77
Central Indo-Pacific	Australia	Torres Strait Northern Great Barrier Reef	16	GBR55	-12.38	143.76
Central Indo-Pacific	Australia	Torres Strait Northern Great Barrier Reef	16	GBR56	-12.38	143.76
Central Indo-Pacific	Australia	Torres Strait Northern Great Barrier Reef	16	QLD108	-10.06	143.84
Central Indo-Pacific	Australia	Torres Strait Northern Great Barrier Reef	16	QLD99	-9.97	144.15
Central Indo-Pacific	Australia	Torres Strait Northern Great Barrier Reef	16	QLD101	-9.96	144.15
Central Indo-Pacific	Australia	Torres Strait Northern Great Barrier Reef	16	QLD102	-9.96	144.16
Central Indo-Pacific	Australia	Torres Strait Northern Great Barrier Reef	16	QLD89	-10.5	141.23
Central Indo-Pacific	Australia	Torres Strait Northern Great Barrier Reef	16	QLD90	-10.5	141.23
Central Indo-Pacific	Australia	Torres Strait Northern Great Barrier Reef	16	QLD56	-14.65	145.46
Central Indo-Pacific	Australia	Torres Strait Northern Great Barrier Reef	16	QLD55	-14.65	145.45
Central Indo-Pacific	Australia	Torres Strait Northern Great Barrier Reef	16	QLD57	-14.65	145.45
Central Indo-Pacific	Australia	Torres Strait Northern Great Barrier Reef	16	NQ7	-12.09	143.26
Central Indo-Pacific	Australia	Torres Strait Northern Great Barrier Reef	16	NQ5	-12.09	143.25
Central Indo-Pacific	Australia	Torres Strait Northern Great Barrier Reef	16	NQ4	-12.1	143.26
Central Indo-Pacific	Australia	Torres Strait Northern Great Barrier Reef	16	QLD107	-10.07	143.87
Central Indo-Pacific	Australia	Torres Strait Northern Great Barrier Reef	16	QLD100	-9.96	144.15
Central Indo-Pacific	Australia	Torres Strait Northern Great Barrier Reef	16	QLD93	-10.25	142.48
Central Indo-Pacific	Australia	Torres Strait Northern Great Barrier Reef	16	QLD92	-10.25	142.47
Central Indo-Pacific	Australia	Torres Strait Northern Great Barrier Reef	16	CS217	-10.24	144.41
Central Indo-Pacific	Australia	Torres Strait Northern Great Barrier Reef	16	GBR68	-14.74	145.52
Central Indo-Pacific	Australia	Torres Strait Northern Great Barrier Reef	16	GBR69	-14.75	145.52
Central Indo-Pacific	Australia	Torres Strait Northern Great Barrier Reef	16	QLD50	-14.67	145.44
Central Indo-Pacific	Australia	Torres Strait Northern Great Barrier Reef	16	QLD88	-10.53	141.47
Central Indo-Pacific	Australia	Torres Strait Northern Great Barrier Reef	16	GBR95	-13.18	143.84
Central Indo-Pacific	Australia	Torres Strait Northern Great Barrier Reef	16	QLD110	-10.06	143.88
Central Indo-Pacific	Australia	Torres Strait Northern Great Barrier Reef	16	GBR53	-11.77	143.65
Central Indo-Pacific	Australia	Torres Strait Northern Great Barrier Reef	16	GBR90	-11.76	143.65
Central Indo-Pacific	Australia	Torres Strait Northern Great Barrier Reef	16	GBR52	-10.29	143.71
Central Indo-Pacific	Australia	Torres Strait Northern Great Barrier Reef	16	GBR51	-10.29	143.72
Central Indo-Pacific	Australia	Torres Strait Northern Great Barrier Reef	16	GBR59	-12.87	143.82
Central Indo-Pacific	Australia	Torres Strait Northern Great Barrier Reef	16	GBR82	-11.12	143.02
Central Indo-Pacific	Australia	Torres Strait Northern Great Barrier Reef	16	GBR84	-11.11	143.02
Central Indo-Pacific	Australia	Torres Strait Northern Great Barrier Reef	16	GBR63	-14	144.68
Central Indo-Pacific	Australia	Torres Strait Northern Great Barrier Reef	16	GBR64	-13.99	144.68
Central Indo-Pacific	Australia	Torres Strait Northern Great Barrier Reef	16	GBR65	-14.01	144.71
Central Indo-Pacific	Australia	Torres Strait Northern Great Barrier Reef	16	QLD105	-10.07	143.87
Central Indo-Pacific	Australia	Torres Strait Northern Great Barrier Reef	16	QLD53	-14.65	145.45
Central Indo-Pacific	Australia	Torres Strait Northern Great Barrier Reef	16	GBR54	-12.16	143.65
Central Indo-Pacific	Australia	Torres Strait Northern Great Barrier Reef	16	GBR40	-13.97	144.5
Central Indo-Pacific	Australia	Torres Strait Northern Great Barrier Reef	16	GBR42	-13.98	144.5
Central Indo-Pacific	Australia	Torres Strait Northern Great Barrier Reef	16	QLD48	-14.69	145.44
Central Indo-Pacific	Australia	Torres Strait Northern Great Barrier Reef	16	QLD51	-14.66	145.45
Central Indo-Pacific	Australia	Torres Strait Northern Great Barrier Reef	16	QLD52	-14.66	145.45
Central Indo-Pacific	Australia	Torres Strait Northern Great Barrier Reef	16	GBR43	-13.96	144.38
Central Indo-Pacific	Australia	Torres Strait Northern Great Barrier Reef	16	GBR80	-10.79	142.97
Central Indo-Pacific	Australia	Torres Strait Northern Great Barrier Reef	16	GBR81	-10.79	142.97
Central Indo-Pacific	Australia	Torres Strait Northern Great Barrier Reef	16	GBR50	-10.38	143.93
Central Indo-Pacific	Japan	South Kuroshio	17	JAPAN9	26.6	127.91
Central Indo-Pacific	Japan	South Kuroshio	17	JAPAN5	26.44	127.77
Central Indo-Pacific	Japan	South Kuroshio	17	JAPAN10	26.65	127.82
Central Indo-Pacific	Japan	South Kuroshio	17	JAPAN6	26.65	127.86
Central Indo-Pacific	Japan	South Kuroshio	17	JAPAN8	26.63	127.86
Central Indo-Pacific	Japan	South Kuroshio	17	JAPAN7	26.66	127.87
Central Indo-Pacific	Australia	Gulf of Papua	18	CS206	-9.97	144.69
Central Indo-Pacific	Australia	Gulf of Papua	18	CS194	-10.03	144.7
Central Indo-Pacific	Australia	Gulf of Papua	18	CS208	-9.99	144.69
Central Indo-Pacific	Australia	Gulf of Papua	18	CS209	-9.97	144.69
Central Indo-Pacific	Australia	Gulf of Papua	18	CS207	-9.97	144.69
Central Indo-Pacific	Australia	Gulf of Papua	18	CS205	-9.99	144.68
Central Indo-Pacific	Australia	Gulf of Papua	18	CS210	-10.04	144.69
Central Indo-Pacific	Australia	Gulf of Papua	18	CS193	-10.04	144.69
Central Indo-Pacific	Australia	Gulf of Papua	18	CS204	-10.11	144.69
Central Indo-Pacific	Australia	Gulf of Papua	18	CS203	-10.11	144.68
Central Indo-Pacific	China	Southern China	19	HK1	22.31	114.37
Central Indo-Pacific	China	Southern China	19	HK2	22.31	114.36
Central Indo-Pacific	China	Southern China	19	HK4	22.3	114.32
Central Indo-Pacific	Australia	Coral Sea	20	CS222	-18.09	149.63
Central Indo-Pacific	Australia	Coral Sea	20	CS117	-18.07	149.61
Central Indo-Pacific	Australia	Coral Sea	20	CS116	-18.07	149.61
Central Indo-Pacific	Australia	Coral Sea	20	CS223	-18.09	149.63
Central Indo-Pacific	Australia	Coral Sea	20	CS118	-18.07	149.61
Central Indo-Pacific	Australia	Coral Sea	20	CS119	-18.07	149.62
Central Indo-Pacific	Australia	Coral Sea	20	CS33	-22.16	155.45
Central Indo-Pacific	Australia	Coral Sea	20	CS35	-22.17	155.45
Central Indo-Pacific	Australia	Coral Sea	20	CS32	-22.17	155.48
Central Indo-Pacific	Australia	Coral Sea	20	CS30	-22.17	155.47
Central Indo-Pacific	Australia	Coral Sea	20	CS176	-15.48	147.1
Central Indo-Pacific	Australia	Coral Sea	20	CS173	-15.49	147.11
Central Indo-Pacific	Australia	Coral Sea	20	CS175	-15.49	147.09
Central Indo-Pacific	Australia	Coral Sea	20	CS171	-15.49	147.09
Central Indo-Pacific	Australia	Coral Sea	20	CS172	-15.48	147.1
Central Indo-Pacific	Australia	Coral Sea	20	CS2	-19.28	152.21
Central Indo-Pacific	Australia	Coral Sea	20	CS3	-19.28	152.22
Central Indo-Pacific	Australia	Coral Sea	20	CS8	-19.1	152.39
Central Indo-Pacific	Australia	Coral Sea	20	CS20	-23.25	155.53
Central Indo-Pacific	Australia	Coral Sea	20	CS26	-23.24	155.56
Central Indo-Pacific	Australia	Coral Sea	20	CS27	-23.25	155.57
Central Indo-Pacific	Australia	Coral Sea	20	CS24	-23.24	155.54
Central Indo-Pacific	Australia	Coral Sea	20	CS28	-23.24	155.56
Central Indo-Pacific	Australia	Coral Sea	20	CS23	-23.24	155.56
Central Indo-Pacific	Australia	Coral Sea	20	CS25	-23.24	155.55
Central Indo-Pacific	Australia	Coral Sea	20	CS19	-23.26	155.54
Central Indo-Pacific	Australia	Coral Sea	20	CS105	-17.45	150.95
Central Indo-Pacific	Australia	Coral Sea	20	CS106	-17.45	150.95
Central Indo-Pacific	Australia	Coral Sea	20	CS15	-16.92	150.01
Central Indo-Pacific	Australia	Coral Sea	20	CS130	-16.93	150
Central Indo-Pacific	Australia	Coral Sea	20	CS131	-16.93	150
Central Indo-Pacific	Australia	Coral Sea	20	CS228	-16.94	150
Central Indo-Pacific	Australia	Coral Sea	20	CS229	-16.94	150
Central Indo-Pacific	Australia	Coral Sea	20	CS132	-16.93	149.99
Central Indo-Pacific	Australia	Coral Sea	20	CS133	-16.93	149.99
Central Indo-Pacific	Australia	Coral Sea	20	CS16	-16.92	150.01
Central Indo-Pacific	Australia	Coral Sea	20	CS14	-16.94	149.99
Central Indo-Pacific	Australia	Coral Sea	20	CS236	-17.37	152.54
Central Indo-Pacific	Australia	Coral Sea	20	CS231	-17.13	152.14
Central Indo-Pacific	Australia	Coral Sea	20	CS101	-17.41	151.07
Central Indo-Pacific	Australia	Coral Sea	20	CS103	-17.44	151.07
Central Indo-Pacific	Australia	Coral Sea	20	CS102	-17.42	151.07
Central Indo-Pacific	Australia	Coral Sea	20	CS115	-17.43	151.07
Central Indo-Pacific	Australia	Coral Sea	20	CS128	-17.71	148.46
Central Indo-Pacific	Australia	Coral Sea	20	CS124	-17.83	148.5
Central Indo-Pacific	Australia	Coral Sea	20	CS120	-17.86	148.47
Central Indo-Pacific	Australia	Coral Sea	20	CS126	-17.72	148.44
Central Indo-Pacific	Australia	Coral Sea	20	CS129	-17.7	148.46
Central Indo-Pacific	Australia	Coral Sea	20	CS127	-17.72	148.44
Central Indo-Pacific	Australia	Coral Sea	20	CS125	-17.71	148.44
Central Indo-Pacific	Australia	Coral Sea	20	CS70	-21	154.36
Central Indo-Pacific	Australia	Coral Sea	20	CS74	-20.94	154.4
Central Indo-Pacific	Australia	Coral Sea	20	CS63	-21	154.39
Central Indo-Pacific	Australia	Coral Sea	20	CS68	-20.98	154.35
Central Indo-Pacific	Australia	Coral Sea	20	CS66	-21.01	154.39
Central Indo-Pacific	Australia	Coral Sea	20	CS64	-21	154.39
Central Indo-Pacific	Australia	Coral Sea	20	CS65	-21.01	154.39
Central Indo-Pacific	Australia	Coral Sea	20	CS62	-20.98	154.39
Central Indo-Pacific	Australia	Coral Sea	20	CS69	-20.99	154.35
Central Indo-Pacific	Australia	Coral Sea	20	CS151	-16.48	147.87
Central Indo-Pacific	Australia	Coral Sea	20	CS152	-16.47	147.86
Central Indo-Pacific	Australia	Coral Sea	20	CS147	-16.51	147.84
Central Indo-Pacific	Australia	Coral Sea	20	CS226	-16.55	147.82
Central Indo-Pacific	Australia	Coral Sea	20	CS150	-16.49	147.85
Central Indo-Pacific	Australia	Coral Sea	20	CS146	-16.5	147.84
Central Indo-Pacific	Australia	Coral Sea	20	CS149	-16.5	147.84
Central Indo-Pacific	Australia	Coral Sea	20	CS148	-16.51	147.84
Central Indo-Pacific	Australia	Coral Sea	20	CS153	-13.86	146.62
Central Indo-Pacific	Australia	Coral Sea	20	CS154	-13.85	146.63
Central Indo-Pacific	Australia	Coral Sea	20	CS230	-17.14	152.13
Central Indo-Pacific	Australia	Coral Sea	20	CS57	-21.25	155.76
Central Indo-Pacific	Australia	Coral Sea	20	CS55	-21.25	155.76
Central Indo-Pacific	Australia	Coral Sea	20	CS52	-21.26	155.75
Central Indo-Pacific	Australia	Coral Sea	20	CS54	-21.25	155.75
Central Indo-Pacific	Australia	Coral Sea	20	CS60	-21.2	155.77
Central Indo-Pacific	Australia	Coral Sea	20	CS58	-21.2	155.77
Central Indo-Pacific	Australia	Coral Sea	20	CS61	-21.21	155.77
Central Indo-Pacific	Australia	Coral Sea	20	CS56	-21.25	155.76
Central Indo-Pacific	Australia	Coral Sea	20	CS59	-21.2	155.77
Central Indo-Pacific	Australia	Coral Sea	20	CS89	-17.11	152.08
Central Indo-Pacific	Australia	Coral Sea	20	CS97	-17.11	151.96
Central Indo-Pacific	Australia	Coral Sea	20	CS93	-17.13	152.08
Central Indo-Pacific	Australia	Coral Sea	20	CS98	-17.11	151.84
Central Indo-Pacific	Australia	Coral Sea	20	CS91	-17.12	152.07
Central Indo-Pacific	Australia	Coral Sea	20	CS96	-17.11	151.96
Central Indo-Pacific	Australia	Coral Sea	20	CS99	-17.11	151.84
Central Indo-Pacific	Australia	Coral Sea	20	CS90	-17.12	152.07
Central Indo-Pacific	Australia	Coral Sea	20	CS92	-17.13	152.08
Central Indo-Pacific	Australia	Coral Sea	20	CS94	-17.12	152
Central Indo-Pacific	Australia	Coral Sea	20	CS170	-17.12	152
Central Indo-Pacific	Australia	Coral Sea	20	CS100	-17.36	151.53
Central Indo-Pacific	Australia	Coral Sea	20	CS235	-17.47	151.61
Central Indo-Pacific	Australia	Coral Sea	20	CS1	-19.3	152.24
Central Indo-Pacific	Australia	Coral Sea	20	CS140	-16.53	150.27
Central Indo-Pacific	Australia	Coral Sea	20	CS139	-16.53	150.27
Central Indo-Pacific	Australia	Coral Sea	20	CS135	-16.59	150.33
Central Indo-Pacific	Australia	Coral Sea	20	CS138	-16.6	150.34
Central Indo-Pacific	Australia	Coral Sea	20	CS137	-16.6	150.33
Central Indo-Pacific	Australia	Coral Sea	20	CS136	-16.61	150.33
Central Indo-Pacific	Australia	Coral Sea	20	CS141	-16.52	150.28
Central Indo-Pacific	Australia	Coral Sea	20	CS225	-16.53	150.28
Central Indo-Pacific	Australia	Coral Sea	20	CS233	-19.18	152.27
Central Indo-Pacific	Australia	Coral Sea	20	CS234	-19.17	152.27
Central Indo-Pacific	Australia	Coral Sea	20	CS220	-18.99	152.35
Central Indo-Pacific	Australia	Coral Sea	20	CS221	-18.99	152.34
Central Indo-Pacific	Australia	Coral Sea	20	CS87	-17.39	155.86
Central Indo-Pacific	Australia	Coral Sea	20	CS82	-17.42	155.85
Central Indo-Pacific	Australia	Coral Sea	20	CS85	-17.39	155.86
Central Indo-Pacific	Australia	Coral Sea	20	CS77	-17.42	155.84
Central Indo-Pacific	Australia	Coral Sea	20	CS86	-17.39	155.86
Central Indo-Pacific	Australia	Coral Sea	20	CS75	-17.4	155.86
Central Indo-Pacific	Australia	Coral Sea	20	CS81	-17.41	155.86
Central Indo-Pacific	Australia	Coral Sea	20	CS88	-17.38	155.85
Central Indo-Pacific	Australia	Coral Sea	20	CS84	-17.39	155.86
Central Indo-Pacific	Australia	Coral Sea	20	CS79	-17.43	155.85
Central Indo-Pacific	Australia	Coral Sea	20	CS78	-17.42	155.85
Central Indo-Pacific	Australia	Coral Sea	20	CS13	-16.93	149.2
Central Indo-Pacific	Australia	Coral Sea	20	CS12	-16.93	149.19
Central Indo-Pacific	Australia	Coral Sea	20	CS11	-16.94	149.2
Central Indo-Pacific	Australia	Coral Sea	20	CS227	-16.94	149.21
Central Indo-Pacific	Australia	Coral Sea	20	CS9	-16.92	149.2
Central Indo-Pacific	Australia	Coral Sea	20	CS10	-16.95	149.18
Central Indo-Pacific	Australia	Coral Sea	20	CS73	-20.94	154.4
Central Indo-Pacific	Australia	Coral Sea	20	CS45	-22.18	155.18
Central Indo-Pacific	Australia	Coral Sea	20	CS44	-22.18	155.16
Central Indo-Pacific	Australia	Coral Sea	20	CS159	-13.85	146.57
Central Indo-Pacific	Australia	Coral Sea	20	CS158	-13.87	146.58
Central Indo-Pacific	Australia	Coral Sea	20	CS182	-13.89	146.57
Central Indo-Pacific	Australia	Coral Sea	20	CS183	-13.89	146.57
Central Indo-Pacific	Australia	Coral Sea	20	CS156	-13.88	146.56
Central Indo-Pacific	Australia	Coral Sea	20	CS157	-13.9	146.56
Central Indo-Pacific	Australia	Coral Sea	20	CS155	-13.89	146.55
Central Indo-Pacific	Australia	Coral Sea	20	CS177	-13.99	146.69
Central Indo-Pacific	Australia	Coral Sea	20	CS184	-13.8	146.55
Central Indo-Pacific	Australia	Coral Sea	20	CS181	-13.97	146.68
Central Indo-Pacific	Australia	Coral Sea	20	CS180	-13.97	146.67
Central Indo-Pacific	Australia	Coral Sea	20	CS179	-13.98	146.68
Central Indo-Pacific	Australia	Coral Sea	20	CS4	-19.23	152.33
Central Indo-Pacific	Australia	Coral Sea	20	CS219	-19.24	152.36
Central Indo-Pacific	Australia	Coral Sea	20	CS6	-19.26	152.34
Central Indo-Pacific	Australia	Coral Sea	20	CS5	-19.25	152.35
Central Indo-Pacific	Australia	Coral Sea	20	CS38	-22.19	155.36
Central Indo-Pacific	Australia	Coral Sea	20	CS37	-22.19	155.37
Central Indo-Pacific	Australia	Coral Sea	20	CS36	-22.19	155.36
Central Indo-Pacific	Australia	Coral Sea	20	CS71	-21.02	154.37
Central Indo-Pacific	Australia	Coral Sea	20	CS29	-22.17	155.48
Central Indo-Pacific	Australia	Coral Sea	20	CS107	-17.66	150.82
Central Indo-Pacific	Australia	Coral Sea	20	CS109	-17.66	150.82
Central Indo-Pacific	Australia	Coral Sea	20	CS108	-17.66	150.83
Central Indo-Pacific	Australia	Coral Sea	20	CS122	-17.88	148.51
Central Indo-Pacific	Australia	Coral Sea	20	CS123	-17.83	148.51
Central Indo-Pacific	Australia	Coral Sea	20	CS121	-17.86	148.47
Central Indo-Pacific	Australia	Coral Sea	20	CS18	-16.96	149.91
Central Indo-Pacific	Australia	Coral Sea	20	CS145	-16.29	149.96
Central Indo-Pacific	Australia	Coral Sea	20	CS142	-16.3	149.96
Central Indo-Pacific	Australia	Coral Sea	20	CS143	-16.3	149.96
Central Indo-Pacific	Australia	Coral Sea	20	CS17	-16.97	149.9
Central Indo-Pacific	Australia	Coral Sea	20	CS113	-17.77	150.63
Central Indo-Pacific	Australia	Coral Sea	20	CS224	-17.78	150.64
Central Indo-Pacific	Australia	Coral Sea	20	CS114	-17.77	150.63
Central Indo-Pacific	Australia	Coral Sea	20	CS111	-17.71	150.73
Central Indo-Pacific	Australia	Coral Sea	20	CS110	-17.71	150.74
Central Indo-Pacific	Australia	Coral Sea	20	CS112	-17.77	150.63
Central Indo-Pacific	Australia	Coral Sea	20	CS95	-17.12	152
Central Indo-Pacific	Australia	Coral Sea	20	CS7	-19.13	152.39
Central Indo-Pacific	Australia	Coral Sea	20	CS43	-22.19	155.17
Central Indo-Pacific	Australia	Coral Sea	20	CS144	-16.29	149.96
Central Indo-Pacific	Australia	Coral Sea	20	CS41	-22.2	155.29
Central Indo-Pacific	Australia	Coral Sea	20	CS40	-22.2	155.3
Central Indo-Pacific	Tonga	Tonga Islands	21	TONGA10	-18.72	185.85
Central Indo-Pacific	Niue	Tonga Islands	21	NIUE7	-19.06	190.07
Central Indo-Pacific	Niue	Tonga Islands	21	NIUE6	-19.06	190.07
Central Indo-Pacific	Tonga	Tonga Islands	21	TONGA8	-18.71	185.9
Central Indo-Pacific	Tonga	Tonga Islands	21	PAC59	-21.11	185.02
Central Indo-Pacific	Tonga	Tonga Islands	21	PAC60	-21.11	185.02
Central Indo-Pacific	Tonga	Tonga Islands	21	PAC51	-18.03	185.67
Central Indo-Pacific	Tonga	Tonga Islands	21	TONGA5	-20.11	185.27
Central Indo-Pacific	Tonga	Tonga Islands	21	TONGA12	-18.69	185.86
Central Indo-Pacific	Tonga	Tonga Islands	21	PAC55	-20.5	185.25
Central Indo-Pacific	Tonga	Tonga Islands	21	PAC56	-20.5	185.26
Central Indo-Pacific	Tonga	Tonga Islands	21	PAC58	-21.12	184.84
Central Indo-Pacific	Tonga	Tonga Islands	21	TONGA2	-19.84	185.58
Central Indo-Pacific	Tonga	Tonga Islands	21	PAC52	-19.97	185.5
Central Indo-Pacific	Tonga	Tonga Islands	21	PAC53	-19.96	185.5
Central Indo-Pacific	Tonga	Tonga Islands	21	PAC54	-19.96	185.52
Central Indo-Pacific	Tonga	Fiji Islands	22	PAC62	-23.62	181.07
Central Indo-Pacific	Tonga	Fiji Islands	22	PAC63	-23.64	181.07
Central Indo-Pacific	Tonga	Fiji Islands	22	PAC64	-23.65	181.07
Central Indo-Pacific	Tonga	Fiji Islands	22	PAC65	-23.63	181.07
Central Indo-Pacific	Tonga	Fiji Islands	22	PAC68	-23.94	180.88
Central Indo-Pacific	Tonga	Fiji Islands	22	PAC69	-23.94	180.86
Central Indo-Pacific	Tonga	Fiji Islands	22	PAC67	-23.94	180.87
Central Indo-Pacific	Australia	Ningaloo	23	NMP9	-23.13	113.76
Central Indo-Pacific	Australia	Ningaloo	23	NMP28	-23.1	113.79
Central Indo-Pacific	Australia	Ningaloo	23	NMP-C3	-23.14	113.75
Central Indo-Pacific	Australia	Ningaloo	23	NMP-S3	-23.13	113.75
Central Indo-Pacific	Australia	Ningaloo	23	NMP27	-23.13	113.74
Central Indo-Pacific	Australia	Ningaloo	23	NMP11	-23.21	113.76
Central Indo-Pacific	Australia	Ningaloo	23	NMP32	-23.16	113.76
Central Indo-Pacific	Australia	Ningaloo	23	NMP6	-23.16	113.76
Central Indo-Pacific	Australia	Ningaloo	23	NMP7	-23.16	113.77
Central Indo-Pacific	Australia	Ningaloo	23	NMP29	-23.17	113.76
Central Indo-Pacific	Australia	Ningaloo	23	NMP25	-23.19	113.75
Central Indo-Pacific	Australia	Ningaloo	23	NMP26	-23.22	113.75
Central Indo-Pacific	Australia	Ningaloo	23	NMP20	-23.04	113.82
Central Indo-Pacific	Australia	Ningaloo	23	NMP30	-23.05	113.82
Central Indo-Pacific	Australia	Ningaloo	23	NMP2	-23.12	113.76
Central Indo-Pacific	Australia	Ningaloo	23	NMP24	-23.2	113.76
Central Indo-Pacific	Australia	Ningaloo	23	NMP-C4	-23.2	113.76
Central Indo-Pacific	Australia	Ningaloo	23	NMP31	-23.21	113.76
Central Pacific	French Polynesia	Tuamotus	24	FP66	-23.1	225.13
Central Pacific	French Polynesia	Tuamotus	24	FP68	-23.1	225.13
Central Pacific	French Polynesia	Tuamotus	24	FP23	-23.1	225.14
Central Pacific	French Polynesia	Tuamotus	24	FP48	-16.7	214.64
Central Pacific	French Polynesia	Tuamotus	24	FP20	-16.08	214.31
Central Pacific	French Polynesia	Tuamotus	24	FP52	-16.08	214.31
Central Pacific	French Polynesia	Tuamotus	24	FP54	-16.07	214.3
Central Pacific	French Polynesia	Tuamotus	24	FP55	-16.08	214.29
Central Pacific	French Polynesia	Tuamotus	24	FP19	-16.07	214.3
Central Pacific	French Polynesia	Tuamotus	24	FP49	-16.51	214.54
Central Pacific	French Polynesia	Tuamotus	24	FP50	-16.52	214.54
Central Pacific	French Polynesia	Tuamotus	24	FP33	-18.08	218.99
Central Pacific	French Polynesia	Tuamotus	24	FP31	-18.09	219
Central Pacific	French Polynesia	Tuamotus	24	FP32	-18.07	219
Central Pacific	French Polynesia	Tuamotus	24	FP64	-23.13	225.09
Central Pacific	French Polynesia	Tuamotus	24	FP65	-23.13	225.1
Central Pacific	French Polynesia	Tuamotus	24	FP30	-23.16	224.98
Central Pacific	French Polynesia	Tuamotus	24	FP69	-23.17	224.95
Central Pacific	French Polynesia	Tuamotus	24	FP37	-16.63	216.43
Central Pacific	French Polynesia	Tuamotus	24	FP38	-16.45	216.04
Central Pacific	French Polynesia	Tuamotus	24	FP35	-16.62	216.44
Central Pacific	French Polynesia	Tuamotus	24	FP36	-16.62	216.44
Central Pacific	French Polynesia	Tuamotus	24	FP34	-16.62	216.44
Central Pacific	French Polynesia	Tuamotus	24	FP39	-16.44	216.04
Central Pacific	French Polynesia	Tuamotus	24	FP24	-23.16	225.14
Central Pacific	French Polynesia	Tuamotus	24	FP25	-23.16	225.14
Central Pacific	French Polynesia	Tuamotus	24	FP26	-23.17	225.14
Central Pacific	French Polynesia	Tuamotus	24	FP42	-16.85	215.31
Central Pacific	French Polynesia	Tuamotus	24	FP44	-16.85	215.1
Central Pacific	French Polynesia	Tuamotus	24	FP45	-16.84	215.31
Central Pacific	French Polynesia	Tuamotus	24	FP40	-16.86	215.34
Central Pacific	French Polynesia	Tuamotus	24	FP41	-16.86	215.34
Central Pacific	French Polynesia	Tuamotus	24	FP43	-16.85	215.31
Central Pacific	French Polynesia	Tuamotus	24	FP59	-15.8	213.85
Central Pacific	French Polynesia	Tuamotus	24	FP56	-15.94	214.09
Central Pacific	French Polynesia	Tuamotus	24	FP58	-15.95	214.12
Central Pacific	French Polynesia	Tuamotus	24	FP18	-15.94	214.11
Central Pacific	French Polynesia	Tuamotus	24	FP17	-15.93	214.12
Central Pacific	French Polynesia	Tuamotus	24	FP57	-15.92	214.11
Central Pacific	French Polynesia	Tuamotus	24	FP60	-15.79	213.86
Central Pacific	French Polynesia	Marquesas	25	MI6	-8.95	219.84
Central Pacific	French Polynesia	Marquesas	25	MI7	-8.83	219.75
Central Pacific	French Polynesia	Marquesas	25	MI3	-9.4	219.87
Central Pacific	French Polynesia	Marquesas	25	MI2	-9.91	220.9
Central Pacific	French Polynesia	Marquesas	25	MI5	-9.41	219.87
Central Pacific	French Polynesia	Marquesas	25	MI4	-9.4	219.87
Central Pacific	French Polynesia	Marquesas	25	MI1	-9.89	220.92
Central Pacific	Cook Islands	Phoenix/Tokelau/Northern Cook Islands	26	PAC22	-13.23	196.87
Central Pacific	Cook Islands	Phoenix/Tokelau/Northern Cook Islands	26	PAC24	-13.23	196.86
Central Pacific	Cook Islands	Phoenix/Tokelau/Northern Cook Islands	26	PAC15	-13.26	196.89
Central Pacific	Cook Islands	Phoenix/Tokelau/Northern Cook Islands	26	PAC21	-13.31	196.87
Central Pacific	Cook Islands	Phoenix/Tokelau/Northern Cook Islands	26	PAC14	-13.25	196.89
Central Pacific	Cook Islands	Phoenix/Tokelau/Northern Cook Islands	26	PAC20	-13.25	196.91
Central Pacific	Cook Islands	Phoenix/Tokelau/Northern Cook Islands	26	PAC16	-13.25	196.9
Central Pacific	Cook Islands	Phoenix/Tokelau/Northern Cook Islands	26	PAC19	-13.25	196.91
Central Pacific	Cook Islands	Phoenix/Tokelau/Northern Cook Islands	26	PAC17	-13.25	196.9
Central Pacific	Cook Islands	Phoenix/Tokelau/Northern Cook Islands	26	PAC18	-13.26	196.9
Central Pacific	Cook Islands	Phoenix/Tokelau/Northern Cook Islands	26	PAC25	-13.21	196.87
Central Pacific	Cook Islands	Phoenix/Tokelau/Northern Cook Islands	26	PAC23	-13.25	196.88
Central Pacific	French Polynesia	Society Islands	27	FP13	-16.44	208.24
Central Pacific	French Polynesia	Society Islands	27	FP7	-16.69	208.96
Central Pacific	French Polynesia	Society Islands	27	FP6	-16.73	209.03
Central Pacific	French Polynesia	Society Islands	27	PAC1	-17.48	210.18
Central Pacific	French Polynesia	Society Islands	27	FP2	-17.48	210.18
Central Pacific	French Polynesia	Society Islands	27	FP12	-16.44	208.23
Central Pacific	French Polynesia	Society Islands	27	FP8	-16.73	208.95
Central Pacific	French Polynesia	Society Islands	27	FP3	-17.48	210.11
Central Pacific	French Polynesia	Society Islands	27	FP11	-16.75	208.58
Central Pacific	French Polynesia	Society Islands	27	FP14	-16.74	208.58
Central Pacific	French Polynesia	Society Islands	27	FP10	-16.75	208.57
Central Pacific	French Polynesia	Society Islands	27	FP5	-17	210.41
Central Pacific	French Polynesia	Society Islands	27	FP4	-17.49	210.08
Central Pacific	French Polynesia	Society Islands	27	FP9	-16.74	208.58
Central Pacific	Marshall Islands	Marshall Islands	28	AL10	10.23	169.93
Central Pacific	Marshall Islands	Marshall Islands	28	AL2	10.28	169.98
Central Pacific	Marshall Islands	Marshall Islands	28	AL1	10.26	169.98
Central Pacific	Marshall Islands	Marshall Islands	28	AL3	10.22	169.96
Central Pacific	Marshall Islands	Marshall Islands	28	AL8	10.36	169.91
Central Pacific	Marshall Islands	Marshall Islands	28	AL7	10.41	169.91
Central Pacific	Marshall Islands	Marshall Islands	28	RT4	11.17	166.76
Central Pacific	Marshall Islands	Marshall Islands	28	RT10	11.17	166.77
Central Pacific	Marshall Islands	Marshall Islands	28	AL4	10.29	169.85
Central Pacific	Marshall Islands	Marshall Islands	28	AL9	10.29	169.85
Central Pacific	Marshall Islands	Marshall Islands	28	AL5	10.26	169.87
Central Pacific	Marshall Islands	Marshall Islands	28	RT2	11.16	166.89
Central Pacific	Marshall Islands	Marshall Islands	28	RT6	11.16	166.89
Central Pacific	Marshall Islands	Marshall Islands	28	RT1	11.18	166.89
Central Pacific	Marshall Islands	Marshall Islands	28	RT3	11.15	166.84
Central Pacific	Cook Islands	Southern Cook/Austral Islands	29	COOK1	-18.85	200.19
Central Pacific	Cook Islands	Southern Cook/Austral Islands	29	COOK2	-18.86	200.19
Central Pacific	Cook Islands	Southern Cook/Austral Islands	29	COOK4	-18.85	200.19
Central Pacific	Cook Islands	Southern Cook/Austral Islands	29	PAC10	-21.2	200.21
Central Pacific	Cook Islands	Southern Cook/Austral Islands	29	PAC11	-18.05	196.81
Central Pacific	Cook Islands	Southern Cook/Austral Islands	29	PAC12	-18.05	196.81
Central Pacific	French Polynesia	Southern Cook/Austral Islands	29	PAC4	-21.8	205.29
Central Pacific	French Polynesia	Southern Cook/Austral Islands	29	PAC8	-21.8	205.28
Central Pacific	French Polynesia	Southern Cook/Austral Islands	29	PAC7	-21.79	205.3
Central Pacific	French Polynesia	Southern Cook/Austral Islands	29	PAC5	-21.8	205.28
Central Pacific	French Polynesia	Southern Cook/Austral Islands	29	PAC6	-21.81	205.27
Central Pacific	Cook Islands	Southern Cook/Austral Islands	29	PAC13	-18	196.83
Central Pacific	Samoa	Samoa Islands	30	PAC45	-13.82	188.24
Central Pacific	Samoa	Samoa Islands	30	PAC44	-13.82	188.24
Central Pacific	American Samoa	Samoa Islands	30	PAC32	-14.17	190.31
Central Pacific	American Samoa	Samoa Islands	30	PAC31	-14.17	190.31
Central Pacific	American Samoa	Samoa Islands	30	PAC27	-14.16	190.31
Central Pacific	American Samoa	Samoa Islands	30	PAC28	-14.17	190.31
Central Pacific	Tonga	Samoa Islands	30	PAC48	-15.93	186.22
Central Pacific	Tonga	Samoa Islands	30	PAC49	-15.93	186.22
Central Pacific	Tonga	Samoa Islands	30	PAC50	-15.93	186.23
Central Pacific	Tonga	Samoa Islands	30	PAC46	-15.93	186.24
Central Pacific	American Samoa	Samoa Islands	30	PAC33	-14.16	190.32
Central Pacific	American Samoa	Samoa Islands	30	PAC29	-14.16	190.32
Central Pacific	American Samoa	Samoa Islands	30	PAC26	-14.16	190.31
Central Pacific	American Samoa	Samoa Islands	30	PAC42	-14.28	189.33
Central Pacific	American Samoa	Samoa Islands	30	PAC43	-14.28	189.33
Central Pacific	American Samoa	Samoa Islands	30	PAC35	-14.55	191.84
Central Pacific	American Samoa	Samoa Islands	30	PAC36	-14.55	191.84
Central Pacific	American Samoa	Samoa Islands	30	PAC37	-14.54	191.84
Central Pacific	American Samoa	Samoa Islands	30	PAC39	-14.54	191.84
Central Pacific	American Samoa	Samoa Islands	30	PAC34	-14.53	191.84
Central Pacific	American Samoa	Samoa Islands	30	PAC38	-14.54	191.85
Central Pacific	American Samoa	Samoa Islands	30	PAC41	-14.53	191.84
Central Pacific	American Samoa	Samoa Islands	30	PAC40	-14.53	191.84
Central Pacific	Pitcairn Islands	Rapa-Pitcairn	31	PIT1	-24.68	235.2
Central Pacific	Pitcairn Islands	Rapa-Pitcairn	31	PIT4	-24.36	231.64
Central Pacific	Pitcairn Islands	Rapa-Pitcairn	31	PIT3	-24.35	231.65
Central Pacific	Pitcairn Islands	Rapa-Pitcairn	31	PIT5	-24.34	231.66
Central Pacific	United States	Hawaii	32	HAWAII1	21.29	202.14
Central Pacific	United States	Hawaii	32	HAWAII2	21.27	202.16
Central Pacific	United States	Hawaii	32	HAWAII9	21.27	202.3
Central Pacific	United States	Hawaii	32	HAWAII8	21.27	202.31
Central Pacific	United States	Hawaii	32	HAWAII4	21.29	202.14
Central Pacific	United States	Hawaii	32	HAWAII3	21.26	202.17
Central Pacific	United States	Hawaii	32	HAWAII5	21.65	201.94
Central Pacific	United States	Hawaii	32	HAWAII6	21.65	201.94
Central Pacific	United States	Hawaii	32	HAWAII7	21.64	201.93
